# Supplementary material
Source: publisher figshare collection journal article supplement (https://acs.figshare.com/ndownloader/files/5733546)
Supplement: Supplementary file 1 [file 5733546]

## Supporting Information

### Structure-Based Analysis and Optimization of a Highly Enantioselective Catalyst for the Strecker Reaction

Petr Vachal and Eric N. Jacobsen\*

Harvard University, Department of Chemistry and Chemical Biology  
Cambridge, MA 02138

**General:** Boc-*L*-*tert*-leucine was purchased from Fluka, O-Benztriazole-1-*N,N,N',N'*-tetraethyluronium hexafluorophosphate (HBTU) from Advanced ChemTech, (*S*)-*N*-*tert*-Butoxycarbonyl-2-amino-3-methyl-3-phenylbutyric acid *tert*-butylamine salt was purchased from ChiroTech; unless stated otherwise, all other chemicals were purchased from Aldrich or Alfa Aesar and used without purification. (*R,R*)-1,2-Diaminocyclohexane was resolved by literature methods.<sup>1</sup> Imine substrates and Strecker adducts were prepared according to published procedures.<sup>2</sup> <sup>15</sup>N-Benzylamine for the synthesis of isotopically labeled <sup>15</sup>N-2,2-dimethylpropylidene benzylamine was prepared in two steps from <sup>15</sup>N-ammonium chloride according to literature procedure.<sup>3</sup> 2-Hydroxy-5-pivaloyloxy-3-*tert*-butylbenzaldehyde was prepared according to published procedure.<sup>2</sup>

General Procedure for the Preparation of the Urea Catalysts (Illustrated for **1**)<sup>4</sup>

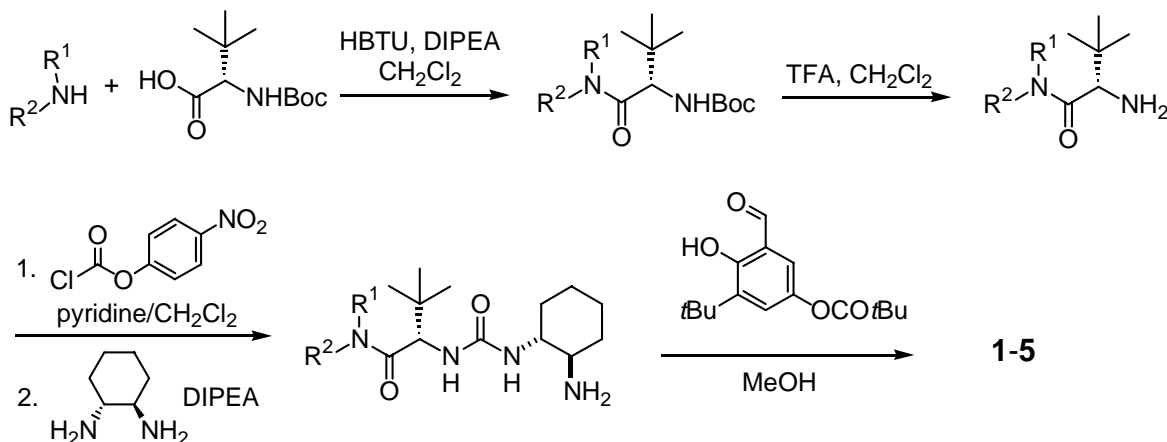

*Coupling of Boc-L-tert-leucine with benzylamine, followed by deprotection:* A 1000-mL round bottom flask equipped with a stirbar was charged with 5.00 g (21.6 mmol) of Boc-*L*-*tert*-leucine. Dichloromethane (170 mL) and HBTU (8.21 g, 1.0 eq.) were added with stirring. After 2 min, DIPEA (7.55 mL, 2 eq.) and benzylamine (2.37

mL, 1.0 eq.) were added sequentially and the reaction was stirred for 90 min. The mixture was combined with dichloromethane (250 mL) and water (250 mL) and the organic layer was separated, washed three times with 1N hydrochloric acid (250 mL), and dried over sodium sulfate. Solvents were removed in vacuo to afford crude Boc-protected amide as colorless oil. The oil was dissolved in dichloromethane (110 mL); then trifluoroacetic acid (25 mL, 15 eq.) was added in one portion and the reaction was stirred at rt for 1 hour. The reaction mixture was then cooled to 0°C and a 20% aqueous solution of sodium carbonate (250 mL) was added slowly. The resulting biphasic mixture was transferred to a separatory funnel, diluted with chloroform (140 mL), and the organic and aqueous layers were separated. The organic layer was washed with a 20% aqueous solution of sodium carbonate (250 mL). The combined aqueous layers were washed with chloroform (3 x 150 mL). All organic phases were combined, dried over sodium sulfate and concentrated to afford a mixture of product and tetramethylurea as a white solid (4.71 g, 21.4 mmol, 99% over two steps based on crude mass and <sup>1</sup>H NMR analysis). The mixture was carried on to the next step without further purification. The spectral properties are as follows: mp 53-54 °C: IR (KBr) 3303, 1650 cm<sup>-1</sup>; <sup>1</sup>H NMR (400 MHz, CDCl<sub>3</sub>) δ 7.33 (m, 5H), 7.05 (s, 1H), 4.45 (d, *J* = 0.9 Hz, 1H), 4.43 (d, *J* = 0.9 Hz, 1H), 3.14 (s, 1H), 1.41 (s, 2H), 1.01 (s, 9H); <sup>13</sup>C NMR {<sup>1</sup>H} (100 MHz, CDCl<sub>3</sub>) δ 173.4, 138.5, 128.5, 127.8, 127.3, 64.3, 43.0, 34.1, 26.7; HRMS (*M* + *H*) calcd 221.1654, obsd 221.1658.

*Carbamate and urea formation:* A 500mL-round-bottom flask equipped with a stir bar was flame-dried and charged with the entire amount of crude amine obtained from the previous step (4.71 g, 21.4 mmol) dissolved in freshly distilled dichloromethane (50 mL). Freshly distilled pyridine (3.49 mL, 2 equiv.) was added via syringe to the stirred solution; after 2 min, 4-nitrophenylchloroformate (4.44 g, 1.02 equiv.) was added in one portion. After the reaction was stirred for 10 min, (*R,R*)-1,2-diaminocyclohexane (7.40 g, 3 equiv.) was added in one portion, followed by addition of DIPEA (4.2 mL, 1.1 equiv.) via syringe, and the reaction mixture was stirred for an additional 10 min. The resulting mixture was then combined with dichloromethane (500 mL) and 0.5 M sodium hydroxide solution (120 mL). The organic layer was separated, washed with another portion of 0.5 M sodium hydroxide solution (120 mL), and dried over sodium sulfate. The organic layer was concentrated to afford viscous oil, which was suspended in hexanes (500 mL). The resulting mixture was allowed to stand for 30 min, and then filtered, with the collected solids then washed with (3 x 125 mL) hexanes. The product was obtained as a white powder (6.25 g, 17.3 mmol, 82% yield over 2 steps) with no impurities detectable by <sup>1</sup>H NMR analysis (for some urea catalysts, the amine product was purified by flash chromatography on silica gel; eluent: 2M solution of ammonia in methanol/dichloromethane = 1/9): IR (thin film) 3284, 2934, 2858, 1631, 1555 cm<sup>-1</sup>; <sup>1</sup>H NMR (400 MHz, CDCl<sub>3</sub>) δ 7.28 (m, 5H), 7.08 (s, 1H), 6.11 (s, 1H), 5.31 (s, 1H), 4.48 (dd, *J*<sub>1</sub> = 14.9 Hz, *J*<sub>2</sub> = 6.1 Hz, 1H), 4.26 (dd, *J*<sub>1</sub> = 14.9 Hz, *J*<sub>2</sub> = 5.1 Hz, 1H), 4.20 (d, *J* = 8.8 Hz, 1H), 3.20 (m, 1H), 2.31 (m, 1H), 1.98 (d, *J* = 11.7 Hz, 1H), 1.85 (m, 2H), 1.68 (d, *J* = 11.2 Hz, 2H), 1.16 (m, 5H), 1.03 (s, 9H); <sup>13</sup>C NMR {<sup>1</sup>H} (100 MHz, CDCl<sub>3</sub>) δ 172.7, 159.0, 138.5, 128.5, 127.5, 127.1, 61.3, 57.0, 55.1, 43.1, 35.0, 34.7, 33.4, 27.1, 25.3, 25.1.

*Schiff base formation:* A 1L-round-bottom flask equipped with a stirbar was charged with 6.25 g of amine prepared in the previous step and anhydrous methanol (40 mL) was added with stirring. Once the solution became homogeneous, sodium sulfate

(10 g) was added. In a separate flask, 2-hydroxy-5-pivaloyloxy-3-*tert*-butylbenzaldehyde (4.73 g, 0.98 eq.) was dissolved in anhydrous methanol (40 mL), then transferred to the reaction mixture. An additional 30 mL of methanol was used to effect quantitative transfer of the aldehyde into the reaction mixture. The reaction mixture was stirred for 90 min, then concentrated under reduced pressure with the sodium sulfate still present. The resulting mixture was combined with hexanes (250 mL) and filtered through a Buchner funnel, and the solids were rinsed with hexanes (250 mL). The filtrate was concentrated under reduced pressure to yield 10.55 g of **1** as a yellow solid (17.0 mmol, 98% yield, 80% overall yield from Boc-*L*-*tert*-leucine): IR (KBr) 3309, 2960, 1752, 1684, 1550, 1437, 1270, 1150, 1116 cm<sup>-1</sup>; <sup>1</sup>H NMR (400 MHz, C<sub>6</sub>D<sub>6</sub>) δ 14.32 (s, 1H), 8.08 (s, 1H), 7.23 (d, *J* = 2.6 Hz, 1H), 7.12 (m, 2H), 7.08 (m, 2H), 7.02 (d, *J* = 2.6 Hz, 1H), 7.00 (t, *J* = 7.1 Hz, 1H), 6.67 (m, 1H), 5.63 (m, 1H), 4.59 (m, 1H), 4.37 (dd, *J* = 14.8, 6.6 Hz, 1H), 4.29 (d, *J* = 9.1 Hz, 1H), 3.86 (dd, *J* = 14.8, 4.6 Hz, 1H), 3.43 (m, 1H), 3.15 (m, 1H), 1.95 (m, 1H), 1.68- 1.0 (m, 7H), 1.51 (s, 9H), 1.30 (s, 9H), 1.05 (s, 9H); <sup>13</sup>C NMR {<sup>1</sup>H} (100 MHz, CDCl<sub>3</sub>) δ 177.4, 172.0, 164.3, 158.1, 157.7, 141.7, 138.5, 130.1, 128.4, 127.4, 127.1, 122.6, 121.2, 118.1, 70.3, 61.5, 54.0, 43.1, 38.9, 34.8, 34.7, 31.5, 29.1, 27.1, 26.7, 24.2, 23.6, 22.6; HRMS (ES) (M)<sup>+</sup> calcd 621.4016, obsd 621.3986.

**2:** Catalyst was prepared in 50% overall yield according to the general procedure for the synthesis of urea catalysts. The spectral properties are as follows: IR (thin film) 3368, 1750, 1633, 1550cm<sup>-1</sup>; <sup>1</sup>H NMR (400 MHz, CDCl<sub>3</sub>) δ 14.22 (s, 1H), 8.22 (s, 1H), 7.24 (m, 3H), 7.14 (m, 2H), 6.94 (d, *J* = 6 Hz, 1H), 6.76 (d, *J* = 6 Hz, 1H), 5.38 (d, *J* = 9 Hz, 1H), 5.33 (d, *J* = 8 Hz, 1H), 4.81 (m, 1H), 4.70 (m, 1H), 4.38 (d, *J* = 15 Hz, 0.3H), 4.10 (d, *J* = 15 Hz, 0.7H), 3.34 (m, 1H), 3.17 (m, 1H), 2.91 (s, 0.7x3H), 2.79 (s, 0.3x3H), 1.99 (d, *J* = 12Hz, 1H), 1.81 (d, 12Hz, 1H), 1.69 (m, 2H), 1.21-1.50 (m, 4H), 1.40 (s, 0.7x9H), 1.39 (s, 0.3x9H), 1.34 (s, 0.7x9H), 1.33 (s, 0.3x9H), 0.91 (s, 0.7x9H), 0.86 (s, 0.3x9H); <sup>13</sup>C NMR {<sup>1</sup>H} (100 MHz, CDCl<sub>3</sub>) δ 177.4, 173.01, 164.1, 158.2, 141.8, 138.6, 136.9, 129.9, 128.2, 128.1, 127.8, 127.3, 126.4, 122.6, 121.2, 118.2, 72.0, 69.0, 55.2, 49.2, 38.9, 36.4, 36.2, 34.9, 33.2, 31.5, 29.2, 27.2, 24.2, 23.8; MS (MH)<sup>+</sup> 635.6.

**3:** Catalyst was prepared in 34% overall yield according to the general procedure for the synthesis of urea catalysts. The spectral properties are as follows: IR (thin film) 3370, 1748, 1632, 1550, 1438 cm<sup>-1</sup>; <sup>1</sup>H NMR (400 MHz, CDCl<sub>3</sub>) δ 13.78 (s, 1H), 8.27 (s, 1H), 7.26 (s, 6H), 6.94 (s, 4H), 6.94 (d, *J* = 2.6 Hz, 1H), 6.77 (s, 1H), 5.07 (d, *J* = 14.6 Hz, 1H), 4.88 (d, *J* = 9.2 Hz, 1H), 4.77 (d, *J* = 16.1 Hz, 1H), 4.59 (s, 1H), 4.26 (d, *J* = 16.1 Hz, 1H), 3.90 (d, *J* = 14.6 Hz, 1H), 3.41 (s, 1H), 3.23 (s, 1H), 2.07 (s, 1H), 1.88 (m, 1H), 1.79-1.60 (m, 4H), 1.55-1.36 (m, 2H), 1.39 (s, 9H), 1.33 (s, 9H), 0.89 (s, 9H); <sup>13</sup>C NMR {<sup>1</sup>H} (100 MHz, CDCl<sub>3</sub>) δ 177.4, 173.3, 164.3, 158.2, 157.0, 128.7, 128.7, 128.1, 127.8, 127.7, 127.5, 122.6, 121.2, 118.2, 70.3, 55.2, 54.3, 50.8, 47.7, 38.9, 36.0, 34.9, 33.0, 31.1, 29.2, 27.1, 26.9, 26.6, 24.4, 23.5; MS (TOF) m/z (M+H) calcd 711.4, obs 711.6.

**4:** *Coupling with Boc-L-tert-leucine* was performed using dimethylamine hydrochloride (1equiv) and DIPEA (3 equiv).

*Boc deprotection:* A 25-mL, round-bottomed flask equipped with a stirbar was charged with N-(*tert*-Butoxycarbonyl)-*L*-*tert*-Leucine N,N-dimethylamide (2.0 mmol). A

4 M solution of hydrogen chloride in 1,4-dioxane (5 mL) was added at room temperature with stirring. After 2 hours, solvents were removed in vacuo. The product was used as hydrochloric salt in the subsequent step without further purification. The subsequent steps were performed according to the general procedure for urea catalysts (3 equivalents of pyridine were used for the urea formation). The product was isolated as a yellow solid in 16% overall yield. The spectral properties are as follows: IR (thin film) 3400, 1750, 1633, 1557, 1437  $\text{cm}^{-1}$ ;  $^1\text{H}$  NMR (400 MHz,  $\text{CDCl}_3$ )  $\delta$  13.72 (s, 1H), 8.27 (s, 1H), 6.94 (d,  $J$  = 2.9 Hz, 1H), 6.79 (d,  $J$  = 2.6 Hz, 1H), 5.06 (s, 1H), 4.65 (d,  $J$  = 9.2 Hz, 1H), 4.35 (s, 1H), 3.55 (s, 1H), 3.13 (m, 1H), 2.99 (s, 3H), 2.82 (s, 3H), 2.12-2.07 (m, 1H), 1.92-1.84 (m, 1H), 1.82-1.62 (m, 4H), 1.44-1.34 (m, 2H), 1.40 (s, 9H), 1.34 (s, 9H), 0.89 (s, 9H);  $^{13}\text{C}$  NMR  $\{^1\text{H}\}$  (100 MHz,  $\text{CDCl}_3$ )  $\delta$  177.4, 172.7, 164.0, 158.2, 157.2, 141.7, 138.5, 122.5, 121.1, 118.2, 71.3, 54.9, 54.1, 38.9, 38.2, 35.6, 35.5, 34.8, 33.2, 31.6, 29.2, 27.1, 26.4, 24.6, 23.8; MS (TOF)  $m/z$  ( $\text{M}+\text{H}$ ) calcd 559.4, obs 559.5.

**5:** The catalyst was prepared in 31% overall yield from the Boc-amino acid salt (3 equiv. of DIPEA used for the initial coupling), using the general synthetic protocol for the urea catalysts. The spectral properties of the yellow product are as follows: IR (thin film) 2934, 1751, 1632, 1549, 1439  $\text{cm}^{-1}$ ;  $^1\text{H}$  NMR (400 MHz,  $\text{CDCl}_3$ )  $\delta$  13.72 (s, 1H), 8.31 (s, 1H), 7.37 (d,  $J$  = 7.3 Hz, 2H), 7.26 (t,  $J$  = 6.7 Hz, 2H), 7.18 (t,  $J$  = 7.3 Hz, 1H), 6.93 (d,  $J$  = 2.7 Hz, 1H), 6.81 (s, 1H), 5.24 (s, 1H), 4.86 (d,  $J$  = 7.9 Hz, 1H), 4.41 (s, 1H), 3.56 (m, 1H), 3.19 (m, 1H), 2.57 (s, 3H), 3.09 (s, 3H), 1.89 (d,  $J$  = 11.3 Hz, 1H), 1.77 (m, 3H), 1.67 (d,  $J$  = 13.7 Hz, 1H), 1.48-1.33 (m, 3H), 1.39 (s, 9H), 1.35 (s, 3H), 1.33 (s, 12H);  $^{13}\text{C}$  NMR  $\{^1\text{H}\}$  (100 MHz,  $\text{CDCl}_3$ )  $\delta$  177.4, 171.7, 164.1, 158.2, 157.1, 145.9, 141.7, 138.6, 127.9, 126.8, 126.4, 122.6, 121.1, 118.2, 71.4, 56.1, 54.3, 42.5, 38.9, 36.7, 35.1, 34.9, 33.3, 31.6, 29.2, 27.1, 26.4, 24.7, 23.8, 22.4; MS (TOF)  $m/z$  ( $\text{M}+\text{H}$ ) calcd 621.4, obs 621.3.

*Synthesis of catalyst 6:*

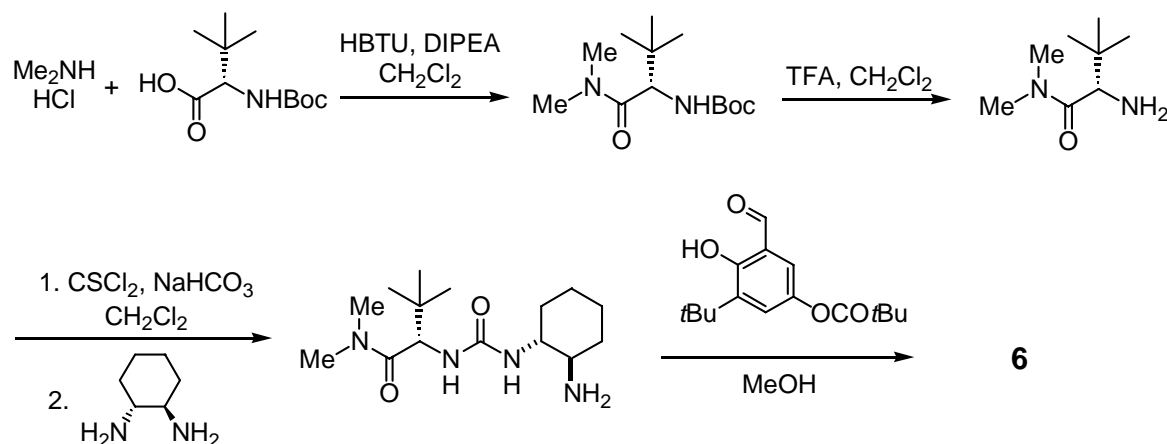

*Coupling of Boc-L-tert-leucine with benzylamine, followed by deprotection was performed according to the procedure described for the preparation of 4.*

**Thiourea formation:**<sup>5</sup> A 500mL-round bottom flask equipped with a stir bar was charged with 1.86 g (9.54 mmol) of crude amine hydrochloride from the deprotection step. To this mixture dichloromethane (50 mL), and saturated aqueous solution of sodium bicarbonate was added. The biphasic mixture is cooled to 0°C and neat thiophosgene (0.80 mL, 1.1 equiv.) was added via syringe with vigorous stirring. The reaction mixture was vigorously stirred at 0°C for additional 30 min, the organic layer was separated, dried over sodium sulfate, and concentrated in vacuo to afford isothiocyanate used immediately without purification. The crude isothiocyanate was dissolved in freshly distilled dichloromethane (30 mL) and (*R,R*)-1,2-diaminocyclohexane (1.20 g, 1.1 equiv.) was added in one portion. The reaction mixture was allowed to stir at room temperature for 30 min and concentrated in vacuo. Crude product was purified by flash chromatography on silica gel (Eluent: 2M solution of ammonia in methanol/dichloromethane = 1/9, stain with ninhydrine) to afford 2.13 g (75% overall from Boc-*L*-*tert*-leucine) of pure amine.

**Schiff base formation** was performed according to the general procedure for the preparation of urea catalysts (1.00 equivalents of aldehyde used). Catalyst **6** was isolated as a yellow solid in 75% overall yield (from Boc-*L*-*tert*-leucine). The spectral properties are as follows: IR (thin film) 3293, 1750, 1630, 1535cm<sup>-1</sup>; <sup>1</sup>H NMR (400 MHz, CDCl<sub>3</sub>) δ 13.55 (s, 1H), 8.23 (s, 1H), 6.92 (d, *J* = 8 Hz, 1H), 6.85 (d, *J* = 8 Hz, 1H), 6.55 (s, 1H), 6.44 (d, *J* = 7 Hz, 1H), 5.56 (d, *J* = 9 Hz, 1H), 3.83 (m, 1H), 3.18 (s, 3H), 3.11 (td, *J* = 2, 8Hz, 1H), 2.92 (s, 3H), 2.09 (m, 1H), 1.88 (m, 1H), 1.71 (m, 3H), 1.25-1.44 (m, 3H), 1.40 (s, 9H), 1.34 (s, 9H), 0.90 (s, 9H); <sup>13</sup>C NMR {<sup>1</sup>H} (100 MHz, CDCl<sub>3</sub>) δ 177.6, 172.0, 165.0, 157.9, 141.9, 135.5, 123.0, 121.6, 118.2, 60.4, 38.9, 38.4, 36.0, 35.6, 34.9, 29.2, 27.2, 26.6; MS (MH)<sup>+</sup> 575.6.

Asymmetric Strecker reaction of model imine substrate:

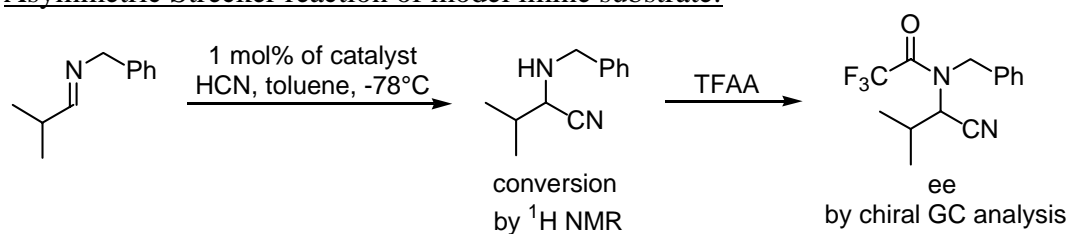

A flame-dried 10mL-round-bottom flask equipped with a stir bar was charged with 0.003 mmol of a catalyst (0.01 equiv.), 2.5 mL of toluene, and imine (0.3 mmol). The reaction was stirred at ambient temperature until catalyst completely dissolved and then cooled below -70 °C by means of a constant temperature bath. A flame-dried 5mL-recovery-flask was equipped with a stir bar and charged with freshly distilled toluene (0.5 mL) and 50 μL TMSCN (1.25 equiv.). The mixture was cooled to 0°C; to this solution 15 μL of anhydrous methanol (1.25 equiv.) was added via syringe; the solution was allowed to stir at 0°C for 2h and then added to reaction flask containing catalyst and substrate by a syringe addition at -78°C. After 15h, a sample was transferred into a precooled vial via a precooled syringe and the solvents were removed under reduced pressure at low temperature to ensure no reaction progress during this operation. The conversion of the Strecker reaction was determined by <sup>1</sup>H NMR (product/imine). To the NMR sample, an

excess of TFAA (approx. 5 equiv.) was added at room temperature in one portion and the resulting trifluoroacetamide of the Strecker adduct was analyzed by chiral GC analysis.<sup>2</sup>

**Identification of the active site of the catalyst:** Several derivatives of **1** were prepared and tested as catalyst in the asymmetric Strecker reaction of *N*-(2,2-dimethylpropylidene) benzylamine; the screen was conducted according to the general procedure given for *N*-isobutylene benzylamine. The results and comments are summarized in the following Table:

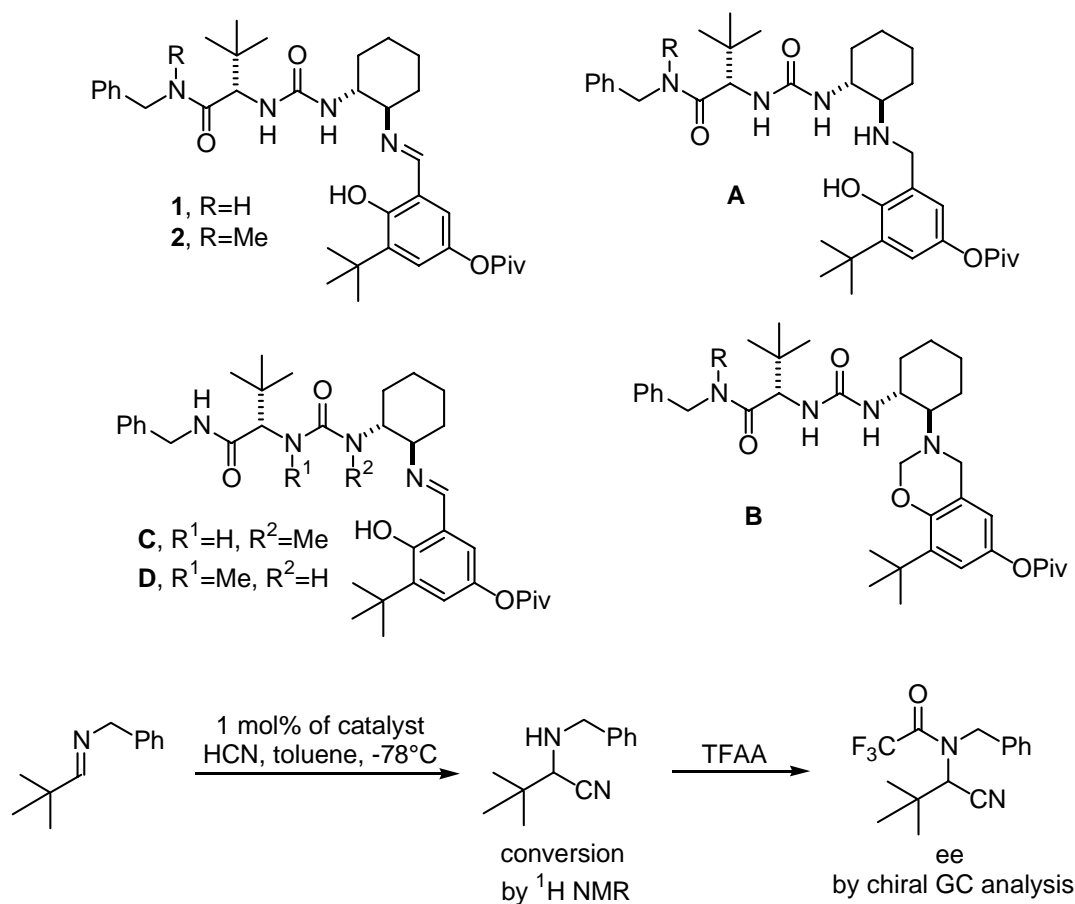

| Entry | Catalyst | Conv. <sup>a</sup> (%) | Ee (%) | Comments                                                                                                                                            |
|-------|----------|------------------------|--------|-----------------------------------------------------------------------------------------------------------------------------------------------------|
| 1     | <b>1</b> | > 99                   | 95.6   |                                                                                                                                                     |
| 2     | <b>2</b> | > 99                   | 96.4   | <b>2</b> even better catalyst than <b>1</b> → amide H not active site                                                                               |
| 3     | <b>A</b> | > 99                   | 85     | Ee declines from <b>1</b> (not surprise: weaker H-bond, etc.)                                                                                       |
| 4     | <b>B</b> | > 99                   | 88     | <b>B</b> better catalyst than <b>A</b> → phenol H not active site                                                                                   |
| 5     | <b>C</b> | 83                     | 13     | <b>C</b> and <b>D</b> are significantly worse catalysts than <b>1</b> →<br>→ urea H(s) are important for both rate and ee; might be the active site |
| 6     | <b>D</b> | 46                     | 27     |                                                                                                                                                     |

<sup>a</sup>: in 15h at -78°C

**Kinetics, General:** Reaction kinetics were investigated using an ASI 1000 React-IR™ instrument equipped with a silicon probe. The probe was dried by heating with a heat gun (<200°C) and allowed to cool under nitrogen atmosphere prior to each run to ensure reproducible results. Rate dependence on the concentration of each reagent was investigated under pseudo-constant concentration of remaining reagents by monitoring the change of the initial rate (10% conversion) as a function of investigated reagent concentration. The Strecker reaction was conducted by the means of the general protocol given for the testing of catalyst derivatives. The observed dependence on the concentration of each reagent is given bellow (Charts 1-3). Saturation kinetics in imine substrate was confirmed by Lineweaver Burk plot (Chart 4):

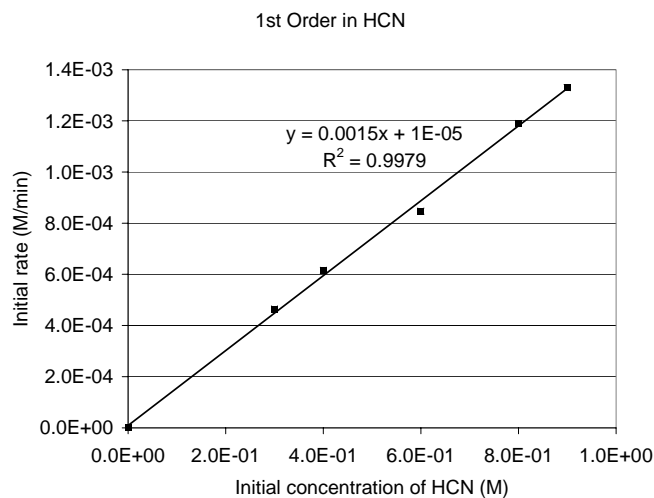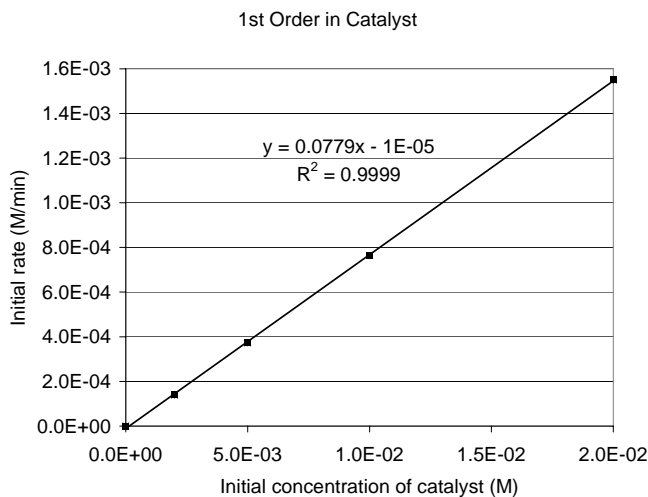

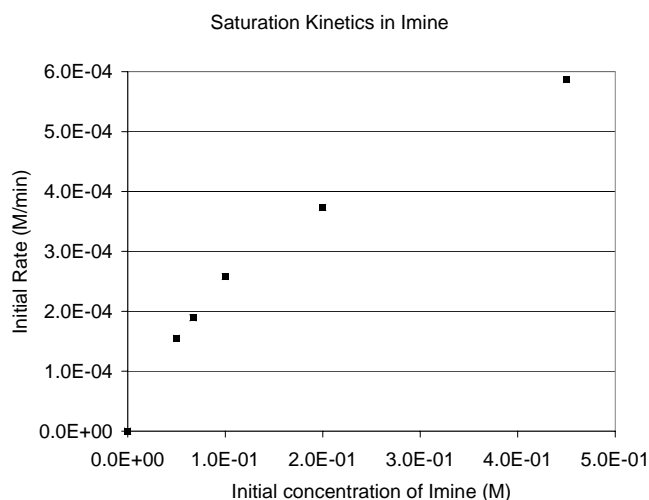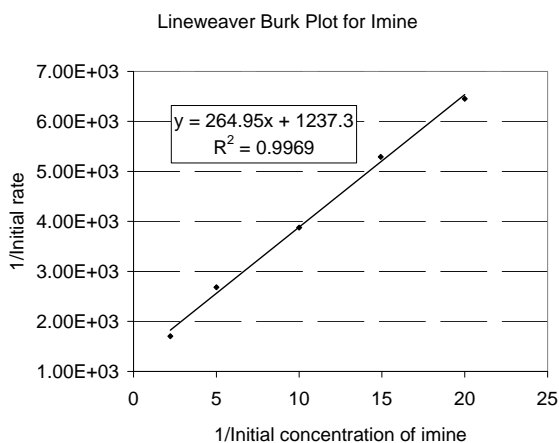

**NMR Spectroscopy, General:** All experiments were performed using instruments equipped with a Bruker magnet and Varian software. Experiments at room temperature (20°C, regulated) were performed using INOVA 600 MHz instrument. Low temperature (regulated) experiments were performed using INOVA 500 MHz, or MERCURY 400 MHz instruments equipped with an external thermostat filled with liquid nitrogen. All NMR solvents were purchased from Cambridge Isotope Laboratories and used as received. Prior to the ROESY and NOE experiments, the NMR sample was degassed with nitrogen for 10 min.

#### Catalyst 1:

*Assignment of H-signals in relevant solvents (THF and dioxane) for  $^1\text{H}$  NMR was accomplished by COSY connectivity experiments; tBuPiv, tBuAr, ArHa, and ArHb were assign based on their NOE interactions (NOESY, ROESY):*



10mM **1** in  $d_8$ -dioxane:

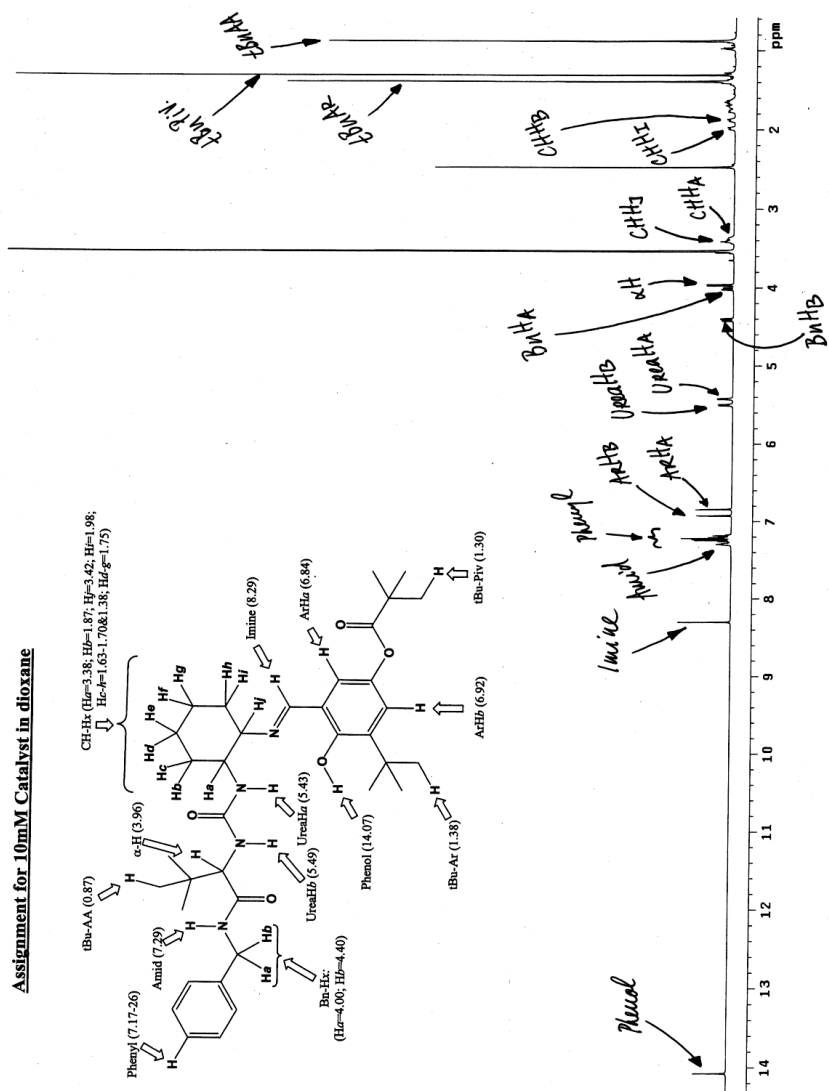

10mM **1** in  $d_8$ -THF:

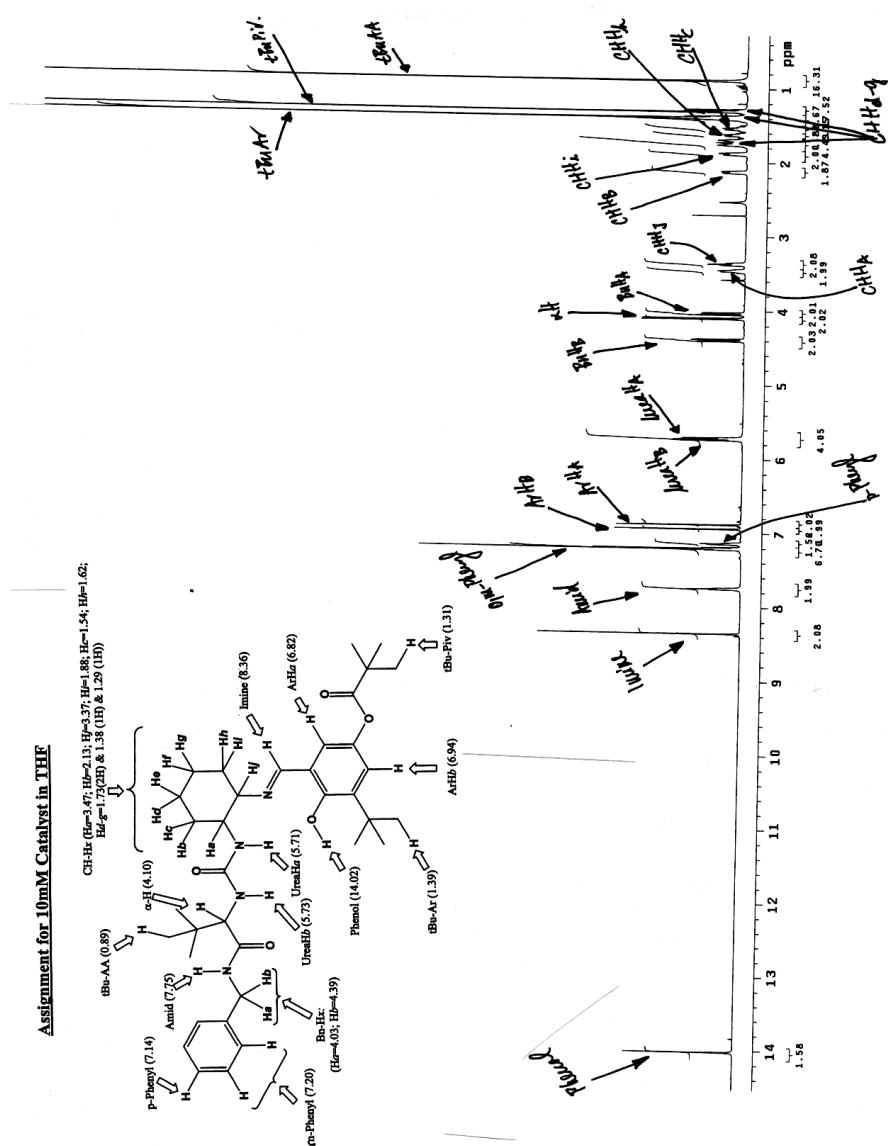

*Determination of the correct mixing time for 2D-ROESY experiments* was accomplished by monitoring of NOE build-up curves (mix=30-600ms) for significant xpeaks in ROESY. Charts below show selected xpeaks for 10mM **1** in  $d_8$ -dioxane (determined as 120 ms) and 50mM **1** in  $d_8$ -THF (determined as 160ms; unchanged when imine substrate was present); other conditions: i600, d1=2s, t=20°C (regulated), nt=4, ni=350, sw=9000.

NOE build up curves (ROESY): 10 mM **1** in dioxane

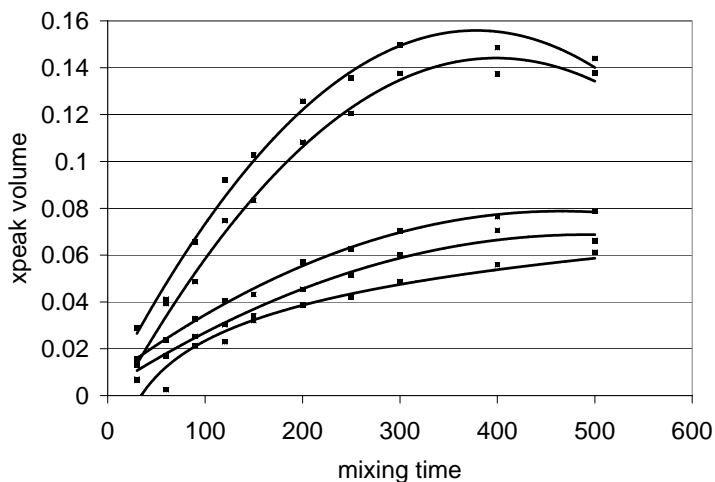

NOE buildup curves (ROESY): 50mM **1** in THF

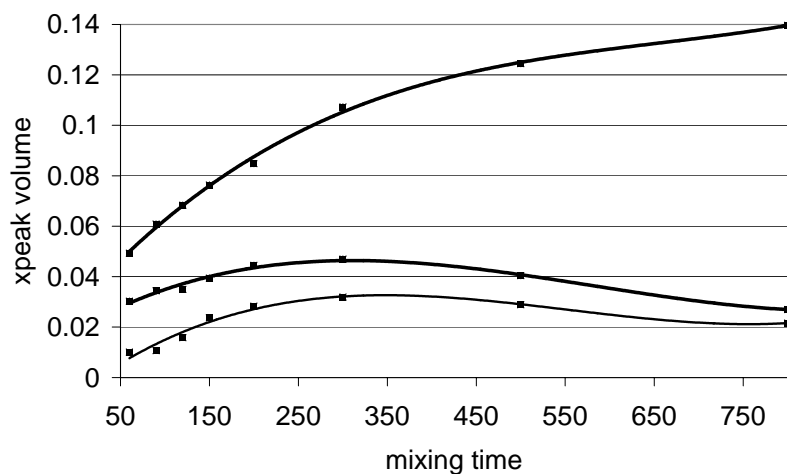

Determination of the correct mixing time for NOESY, and NOESY1D experiments was accomplished by monitoring NOE build up curves for significant xpeaks in NOESY experiment. Chart below shows selected xpeaks for 50mM **1** in  $d_8$ -THF (determined as 160ms; unchanged if imine substrate was present); other conditions: i600, d1=2s, t=20°C (regulated), nt=4, ni=350, sw=9000.

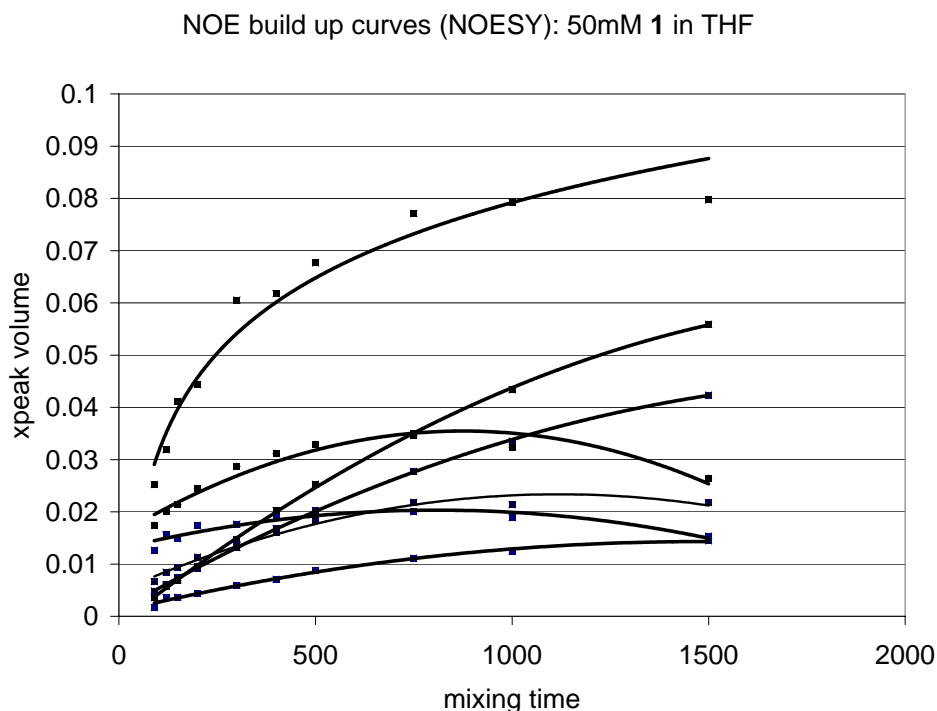

ROESY Experiment, 50mM **1** in  $d_8$ -THF, 20°C (regulated), i600, d1=1s, ni=1K, sw=9000, nt=16, mix=160ms; distance in Å, compare to calculations (MM2):

| Peak1  | Peak 2      | Xpeak<br>volume | distance, Å<br>(ROESY)         | distance, Å<br>(computation) |
|--------|-------------|-----------------|--------------------------------|------------------------------|
| Phenol | Imine       | 0.18            | 3.8                            | 3.9                          |
| Phenol | UreaHa      | 0.09            | 4.2                            | 4.3                          |
| Phenol | CHHa        | 0.074           | 4.4                            | 4.0                          |
| Phenol | tBuAr       | 0.351           | 3.4                            | 4.0                          |
| Imine  | ArHa        | 2.26            | define as 2.46 (law of cosine) |                              |
| Imine  | UreaHa      | 0.242           | 3.6                            | 3.6                          |
| Imine  | CHHa        | 0.714           | 3.0                            | 2.7                          |
| Imine  | CHHj        | 4.15            | 2.2                            | 2.4                          |
| Imine  | tBuAA       | 0.577           | 3.1                            | 3.5                          |
| Amide  | $\alpha$ -H | 4.13            | 2.2                            | 2.2                          |
| Amide  | tBuAA       | 1.71            | 2.6                            | 3.7                          |
| ArHb   | tBuAr       | 4.61            | 2.2                            | 2.1                          |
| ArHa   | tBuAr       | 3.57            | 2.3                            | 2.4                          |
| UreaHb | UreaHa      | 3.325           | 2.3                            | 2.3                          |
| UreaHb | tBuAA       | 3.04            | 2.3                            | 2.4                          |

|             |       |       |             |     |
|-------------|-------|-------|-------------|-----|
| UreaHa      | CHHa  | 1.021 | 2.8         | 2.8 |
| UreaHa      | CHHj  | 0.959 | 2.8         | 2.9 |
| $\alpha$ -H | tBuAA | 5.16  | 2.1         | 2.3 |
| BnHb        | BnHa  | 3.685 | mix w/ cosy | 2.2 |

*ROESY Experiment, 10mM 1 in d<sub>8</sub>-dioxane, 20°C (regulated), i600, d1=1s, ni=1K, sw=9000, nt=16, mix=120ms:*

| Peak 1             | Peak 2                            | ROESY xpeak volume |
|--------------------|-----------------------------------|--------------------|
| Phenol (14.07)     | tBu-Ar (1.38)                     | 0.74519854         |
| Phenol (14.07)     | CH-Ha (3.38)                      | 1.684133           |
| Phenol (14.07)     | Urea-Ha (5.43)                    | 0.200816           |
| Phenol (14.07)     | Imine (8.29)                      | 0.97271824         |
| Imine (8.29)       | tBu-AA (0.87)                     | 1.7759821          |
| Imine (8.29)       | CH-Hb (1.87)                      | 1.97931078         |
| Imine (8.29)       | CH-Ha (3.38)                      | 7.86               |
| Imine (8.29)       | CH-Hj (3.42)                      | 18.64              |
| Imine (8.29)       | Urea-Ha (5.43)                    | 1.442701           |
| Imine (8.29)       | Ar-Ha (6.84)                      | 14.717             |
| Imine (8.29)       | Ar-Hb (6.92)                      | 5.18               |
| Amid (7.29)        | tBu-AA (0.87)                     | 8.62042714         |
| Amid (7.29)        | a-H (3.96)                        | 26.14315296        |
| Amid (7.29)        | Bn-Hb (4.4)                       | 3.20317565         |
| Phenyl (7.17-7.26) | tBu-AA (0.87)                     | 6.48191987         |
| Ar-Hb (6.92)       | tBu-AA (0.87)                     | 2.44275541         |
| Ar-Hb (6.92)       | tBu-Ar (1.38)                     | 37.73484386        |
| Ar-Ha (6.84)       | tBu-AA (0.87)                     | 4.06189233         |
| Ar-Ha (6.84)       | tBu-Ar (1.38)                     | 15.2834654         |
| Urea-Hb (5.49)     | tBu-AA (0.87)                     | 15.27080143        |
| Urea-Hb (5.49)     | a-H (3.96)                        | 3.77627491         |
| Urea-Hb (5.49)     | Urea-Ha (5.43)                    | 15                 |
| Urea-Ha (5.43)     | tBu-AA (0.87)                     | 2.8687825          |
| Urea-Ha (5.43)     | CH-Hc-h (1.63)/<br>CH-Hc-h (1.70) | 3.69794199         |
| Urea-Ha (5.43)     | CH-Ha (3.38)                      | 7.04332542         |
| Urea-Ha (5.43)     | CH-Hj (3.42)                      | 6.04332542         |
| a-H (3.96)         | tBu-AA (0.87)                     | 22.81397889        |
| CH-Hj (3.42)       | tBu-Ar (1.38) or CH               | 7.24282364         |
| CH-Hj (3.42)       | CH-Hb (1.87)                      | 5.1718353          |
| CH-Hj (3.42)       | CH-Hi (1.98)                      | 0.5                |
| CH-Ha (3.38)       | tBu-Ar (1.38) or CH               | 5.23395427         |
| CH-Ha (3.38)       | CH-Hb (1.87)                      | 0.5000001          |
| CH-Ha (3.38)       | CH-Hi (1.98)                      | 5.21282502         |

|                |                     |             |
|----------------|---------------------|-------------|
| CH-Hd-g (1.75) | tBu-Ar (1.38) or CH | 53.46867114 |
| CH-Hc-h (1.70) | tBu-Ar (1.38) or CH | 49.25715698 |

*NOESY1D Experiments, 70mM 1 in d<sub>8</sub>-THF, 20°C (regulated), i600, d1=1s, ni=1K, sw=9000, nt=4000-7000, mix=300ms (presence of 3,4-dihydroisoquinoline did not have an influence on the magnitude of intramolecular xpeaks; same relative volumes observed):*

| Irradiated  | Phenol | Imine | Amide | Phenyl | ArHb | ArHa | UreaHb | UreaHa | $\alpha$ -H | BnHb | BnHa | CHHa | CHHj | CHHb | CHHi | tBuAr | tBuPiv | tBuAA |
|-------------|--------|-------|-------|--------|------|------|--------|--------|-------------|------|------|------|------|------|------|-------|--------|-------|
| Phenol      |        | 0.20  |       |        |      |      |        |        |             |      |      |      |      |      |      | 0.99  |        |       |
| Imine       | 0.19   |       |       |        |      | 1.28 |        | 0.10   |             |      |      | 0.24 | 1.50 |      |      |       |        | 0.17  |
| Amide       |        |       |       | 0.38   |      |      | 0.01   |        | 1.66        |      |      |      |      |      |      |       |        |       |
| ArHb        |        | 0.09  |       |        |      |      |        |        |             |      |      |      |      |      |      | 4.15  | 0.13   |       |
| ArHa        | 0.01   | 0.99  |       |        |      |      |        |        |             |      |      |      |      |      |      | 0.05  | 0.09   | 0.14  |
| UreaHb      |        | 0.10  |       |        |      |      |        |        |             |      |      |      |      |      |      |       |        | 1.73  |
| UreaHa      |        | 0.27  |       |        |      |      |        |        |             |      |      | 0.86 | 0.71 |      |      |       |        |       |
| $\alpha$ -H |        |       | 1.09  |        |      |      |        |        |             |      |      |      |      |      |      |       |        | 2.11  |
| BnHb        |        |       |       | 0.41   |      |      |        |        |             |      |      |      |      |      |      | 0.03  |        | 0.11  |
| BnHa        |        |       |       | 0.46   | 0.03 |      |        |        |             |      |      |      |      |      |      | 0.03  |        | 0.05  |
| CHHa        | 0.05   | 0.25  |       |        |      |      |        | 0.64   |             |      |      |      |      | 0.80 |      |       |        |       |
| CHHj        | 0.04   | 1.67  |       |        |      |      |        | 0.42   |             |      |      |      |      |      | 0.82 |       |        |       |
| CHHb        |        | 0.02  |       |        |      |      |        | 0.29   |             |      |      | 1.14 | 0.24 |      |      |       |        |       |
| CHHi        | 0.01   | 0.27  |       |        |      |      |        |        |             |      |      | 0.22 | 1.07 |      |      |       |        |       |
| tBuAr       | 0.06   |       |       |        | 0.99 |      |        |        |             |      |      |      |      |      |      |       |        |       |
| tBuPiv      |        |       |       |        | 0.01 | 0.01 |        |        |             |      |      |      |      |      |      | 0.14  |        | 0.16  |
| tBuAA       |        | 0.05  | 0.12  | 0.10   |      | 0.01 | 0.34   |        | 0.69        | 0.12 | 0.15 |      |      |      |      | 0.14  | 0.16   |       |

*Intermolecular xpeaks between catalyst **1** and 3,4-dihydroisoquinoline.* The xpeaks were observed in NOESY1D experiment, 20°C (regulated), nt=4000-12000, d1=0.1-1s, sw=9000, 70mM **1** and 330mM in 3,4-dihydroisoquinoline in *d*<sub>8</sub>-THF. Since correct mixing time was not established for catalyst/substrate complex, reported xpeak volumes should be considered as qualitative, not quantitative measure of the distance. Following Figure shows important intermolecular xpeaks; integrated values are given in the Table:

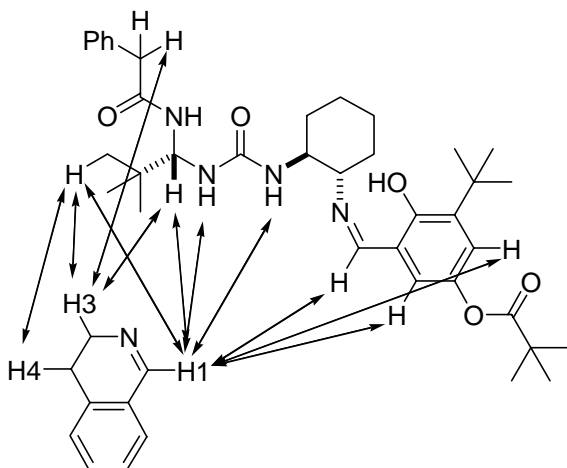

Intermolecular xpeak volume:

|        | H1   | H3   | H4   |
|--------|------|------|------|
| Phenol |      |      |      |
| Imine  | 0.01 |      |      |
| Amide  | 0.05 | 0.10 |      |
| ArHb   | 0.02 |      |      |
| ArHa   | 0.07 |      |      |
| UreaHb | 0.12 |      |      |
| UreaHa | 0.10 |      |      |
| α-H    | 0.07 | 0.08 |      |
| BnHb   |      | 0.10 |      |
| BnHa   | 0.01 | 0.03 |      |
| CHHa   | 0.01 |      |      |
| CHHj   | 0.03 | 0.02 |      |
| CHHb   |      |      |      |
| CHHi   |      |      |      |
| tBuAr  |      |      |      |
| tBuPiv |      |      |      |
| tBuAA  | 0.12 | 0.13 | 0.18 |

*Intermolecular xpeaks between catalyst 1 and a Z-Imine.* The xpeaks were observed in NOESY1D experiment, 20°C (regulated), nt=12000-25000, d1=0.1-1s, sw=9000, 100mM **1** and 90mM imine (overall concentration of both isomers) in *d*<sub>8</sub>-THF. The intensity of the intermolecular xpeaks was low and a quantitative integration was not possible, therefore qualitative comparison is given instead; four significant xpeaks are shown in the following figure:

| Catalyst Peak | Xpeak to $\alpha$ Me (Z-imine) |
|---------------|--------------------------------|
| Phenol        | w                              |
| Imine         | s                              |
| Amide         | --                             |
| ArHb          | s                              |
| ArHa          | s                              |
| UreaHb        | m                              |
| UreaHa        | m                              |
| $\alpha$ -H   | m                              |
| BnHb          | --                             |
| BnHa          | --                             |
| CHHa          | --                             |
| CHHj          | --                             |
| tBuAr         | --                             |
| tBuPiv        | --                             |
| tBuAA         | s                              |

w=weak, m=medium, s=strong

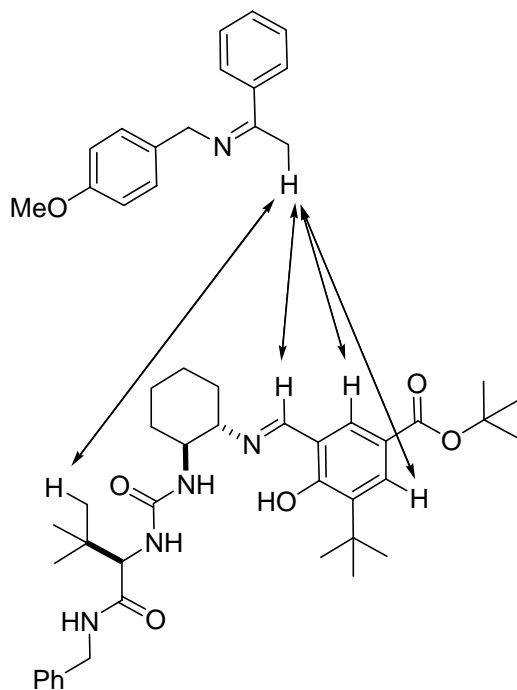



Assignment of H-signals for 25mM **3** in d<sub>8</sub>-THF was accomplished by COSY connectivity experiments. tBuPiv, tBuAA, ArHa, and ArHb were assign based on NOE xpeaks (ROESY):

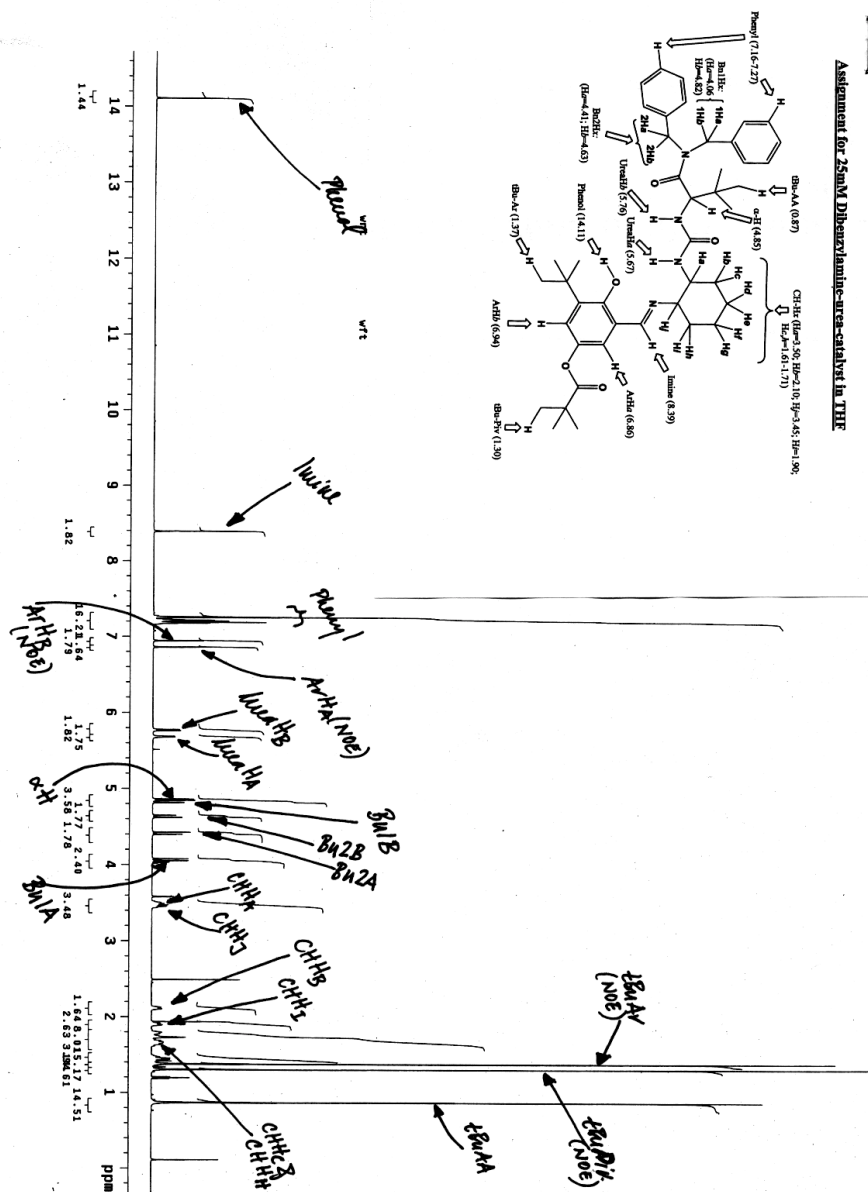

*Determination of the correct mixing time for 2D-ROESY experiments* was accomplished by monitoring the NOE build up curves (mix=60-400ms) for significant xpeaks in 2D-ROESY. Chart shows selected xpeaks for 25mM **3** in  $d_8$ -THF (determined as 120ms); other conditions: i600, d1=1.5s, t=20°C (regulated), nt=4, ni=350, sw=9000.

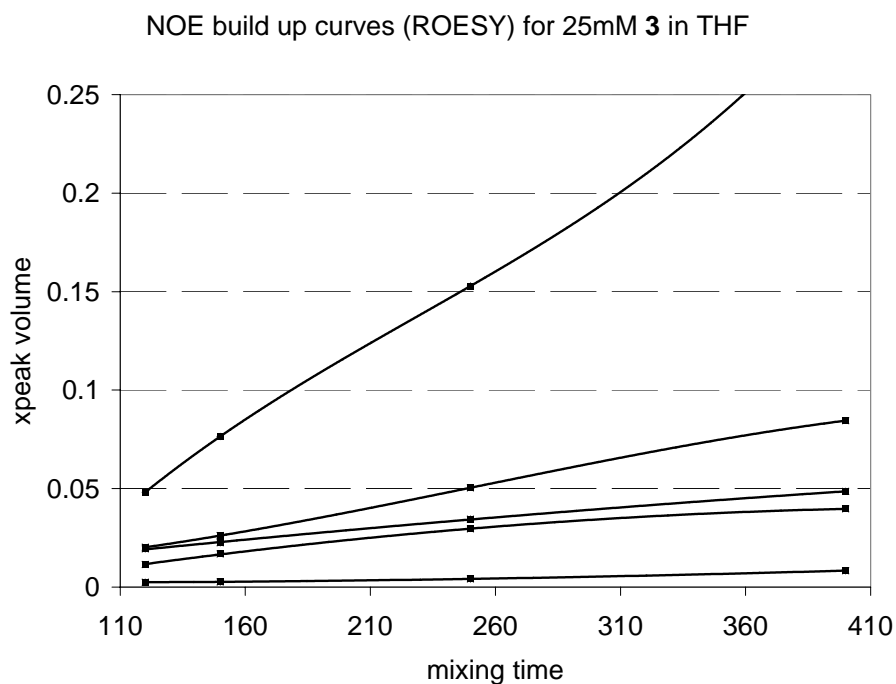

*ROESY Experiment, 25mM 3 in  $d_8$ -THF, 20°C (regulated), i600, d1=1.7s, ni=1.5K, sw=9000, nt=16, mix=120ms; distance calculated based on the relative xpeak volume related to the standard distance in Å; comments included for an easier data analysis:*

| Entry | Peak 1             | Peak 2                | Xpeak vol.        | Dist. | Comments                                      |
|-------|--------------------|-----------------------|-------------------|-------|-----------------------------------------------|
| 1     | Phenol (14.11)     | CHHj (3.45)           | half of 0.402     | nd    | overlap                                       |
| 2     | Phenol (14.11)     | CHHa (3.50)           | half of 0.402     | nd    | overlap                                       |
| 3     | Phenol (14.11)     | Imine (8.39)          | 0.1953            | 3.5   | trivial                                       |
| 4     | Imine (8.39)       | CHHc&CHHh (1.61-1.71) | 0.212             | 3.4   | trivial                                       |
| 5     | Imine (8.39)       | CHHi (1.90)           | 0.304             | 3.2   | sets imine-CH ring conformation (Entries 5-8) |
| 6     | Imine (8.39)       | CHHj (3.45)           | 2.53              | 2.3   |                                               |
| 7     | Imine (8.39)       | CHHa (3.50)           | 1.21 <sup>a</sup> | nd    |                                               |
| 8     | Imine (8.39)       | UreaHa (5.67)         | 0.251             | 3.3   | imine and urea: same face                     |
| 9     | Imine (8.39)       | ArHa (6.86)           | 1.485             | 2.5   | Standard for distance, 2.46Å                  |
| 10    | Imine (8.39)       | ArHb (6.94)           | 0.8395            | 2.7   | trivial                                       |
| 11    | Phenyl (7.15-7.27) | tBuAA (0.87)          | 2.099             | 2.3   | very strong --> hindered face                 |
| 12    | Phenyl (7.15-7.27) | Bn1Ha (4.06)          | 1.027             | 2.6   | trivial                                       |
| 13    | Phenyl (7.15-7.27) | Bn2Ha (4.41)          | 1.244             | 2.5   | trivial                                       |
| 14    | Phenyl (7.15-7.27) | Bn2Hb (4.63)          | 0.6665            | 2.8   | trivial                                       |

|    |                    |                       |                         |     |                                                                  |
|----|--------------------|-----------------------|-------------------------|-----|------------------------------------------------------------------|
| 15 | Phenyl (7.15-7.27) | $\alpha$ -H (4.85)    | 1.544                   | 2.4 | very strong --> hindered face                                    |
| 16 | ArHb (6.94)        | tBuAr (1.37)          | 4.917                   | 2.0 | trivial                                                          |
| 17 | ArHa (6.86)        | tBuAr (1.37)          | 2.262                   | 2.3 | trivial                                                          |
| 18 | Urea Hb (5.76)     | tBuAA (0.87)          | 2.4833                  | 2.3 | trivial                                                          |
| 19 | Urea Hb (5.76)     | $\alpha$ -H (4.85)    | 0.4996                  | 3.0 | trivial                                                          |
| 20 | Urea Hb (5.76)     | UreaHa (5.67)         | 0.617 <sup>b</sup>      | nd  | trivial                                                          |
| 21 | UreaHa (5.67)      | CHHc&CHHh (1.61-1.71) | 0.5958                  | 2.9 | sets Urea-CH ring conformation (Entries 21-24)                   |
| 22 | UreaHa (5.67)      | CHHb (2.10)           | 0.2221                  | 3.4 |                                                                  |
| 23 | UreaHa (5.67)      | CHHj (3.45)           | half of 1.8166          | nd  |                                                                  |
| 24 | UreaHa (5.67)      | CHHa (3.50)           | half of 1.8166          | nd  |                                                                  |
| 25 | $\alpha$ -H (4.85) | tBuAA (0.87)          | 3.887                   | 2.1 | trivial                                                          |
| 26 | $\alpha$ -H (4.85) | Bn2Ha (4.41)          | 2.002                   | 2.3 | confirms rigidity and potential hindrance as origin of enantios. |
| 27 | $\alpha$ -H (4.85) | Bn2Hb (4.63)          | 3.636                   | 2.1 |                                                                  |
| 28 | Bn1Hb (4.82)       | Bn1Ha (4.06)          | 9.0699 <sup>c</sup>     | nd  | trivial                                                          |
| 29 | Bn2Hb (4.63)       | tBuAA (0.87)          | 1.731                   | 2.4 | very strong --> hindered face                                    |
| 30 | Bn2Hb (4.63)       | Bn1Ha (4.06)          | 0.3832                  | 3.1 | weak --> rigid conf., hind. face                                 |
| 31 | Bn2Hb (4.63)       | Bn2Ha (4.41)          | (-) 5.6384 <sup>c</sup> | nd  | trivial                                                          |
| 32 | Bn2Ha (4.41)       | tBuAA (0.87)          | 1.276                   | 2.5 | very strong --> hindered face                                    |
| 33 | CHHa (3.50)        | CHHb (2.10)           | 1.2187                  | 2.5 | trivial                                                          |
| 34 | CHHj (3.45)        | CHHi (1.90)           | 1.2007                  | 2.6 | trivial                                                          |

a: volume magnified by overlap with entry 6; b: volume reduced by close proximity to the diagonal peak; c: mixed with cosy.

#### Isotopically labeled imine experiment:

Direct evidence of binding by <sup>1</sup>H NMR: Following Figure represents two <sup>1</sup>H NMR of the mixture of catalyst **3** with 2,2-dimethylpropylidene benzylamine in *d*<sub>8</sub>-THF printed on the top of each other. Both samples contain the same amount of **3** (0.162M), and the same amount of imine (0.668M). In case of sample 1, <sup>14</sup>N-imine was used (natural abundance); In case of sample 2, <sup>15</sup>N-imine was used (content of <sup>15</sup>N > 99%). Frequency ( $\delta$ ) of none of the protons of **1** has changed ( $\Delta \delta < 1\text{Hz}$ ) as a function of the isotope content of the imine nitrogen, except for 2 signals: both urea-hydrogens ( $\Delta \delta = 16.9\text{Hz}$ , and  $16.1\text{Hz}$ ). Urea region of catalyst **3** is enlarged in the offset. Since the only difference between the two samples is the content of <sup>15</sup>N in the imine substrate, this result represented a direct evidence of imine nitrogen binding to the UreaH's portion of the catalyst.

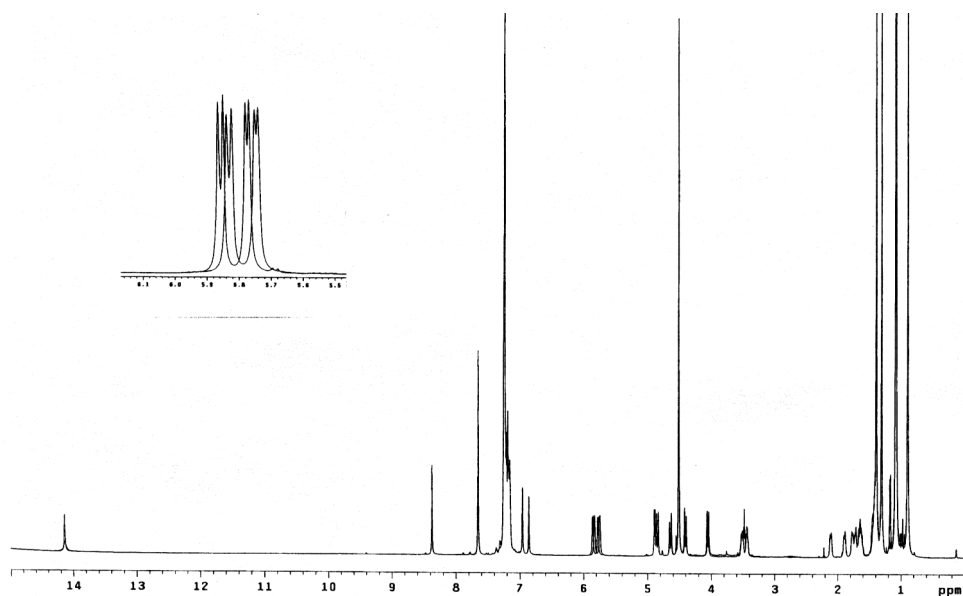

### Equilibrium between E-and Z-stereoisomers of imine substrate by NMR

The sample of  $\alpha$ -methylnaphtylidene allylamine that coexists as a mixture of both stereoisomers was irradiated (saturated) with the frequency of the Z-isomer allylic proton in NOESY1D experiment in  $d_{12}$ -cyclohexane (top spectrum). Exchanging allylic protons of E-isomer ( $\delta = 4.14$  ppm) and Z-isomer ( $\delta = 3.84$  ppm) had the same phase (opposite phase to the NOE xpeaks) as they underwent energy transfer due to chemical exchange. The  $^1\text{H}$  NMR spectrum of the sample is provided below for clarity (Figure follows).

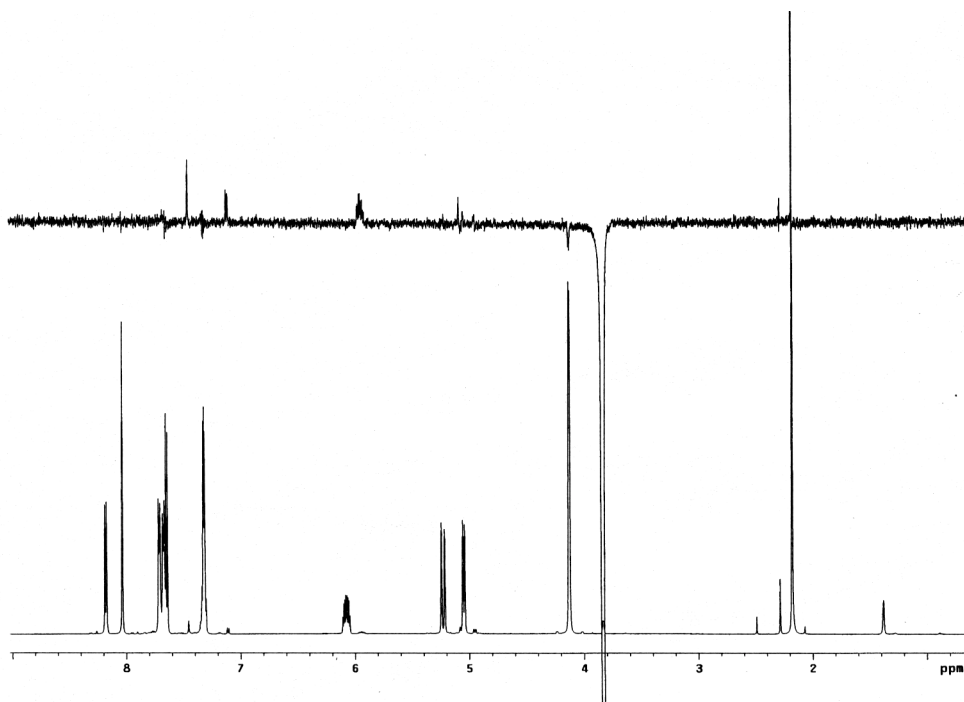

**Computation and Modeling, General:** Calculations were performed using standard computational methods. Theoretical calculations on the simplified system were performed using Gaussian 98;<sup>6</sup> method B3LYP with many available basics sets. Reported data are consistent for all applied basic sets; data shown in Figure 2 of the text relate to 6-31G (d, p) basic set in the gas phase. The strength of the hydrogen bond was calculated as a difference of the energy of the complex and each individual component with dummy-atoms replacing other relevant fragments present in the complex. Calculations of the energy minimum of **1** were performed on Spartan with semi-empirical base, MM2, solvent-free as well as in hexadecane matrix. The 3D pictures of catalyst and catalyst/substrate complex were generated using Spartan and Gaussian 98 and modified in MOLMOL<sup>7</sup> (see the text of the paper for relevant graphics).

Selected example of the resulting Z-matrix for imine-catalyst complex (*N*-ethylidene methylamine and *N,N'*-dimethylthiourea; Figure 1a of the main text):

```

0 1
C
N      1      B1
C      2      B2 1      A1
H      2      B3 1      A2 3      D1
N      2      B4 1      A3 3      D2
C      5      B5 2      A4 1      D3
N      6      B6 5      A5 2      D4
H      7      B7 6      A6 5      D5
S      6      B8 5      A7 2      D6
C      7      B9 6      A8 5      D7
C      5      B10 2      A9 1      D8
H      1      B11 2      A10 3      D9
H      1      B12 2      A11 3      D10
H      1      B13 2      A12 3      D11
H      3      B14 2      A13 1      D12
H      11     B15 5      A14 2      D13
H      11     B16 5      A15 2      D14
H      11     B17 5      A16 2      D15
H      10     B18 7      A17 6      D16
H      10     B19 7      A18 6      D17
H      10     B20 7      A19 6      D18
C      3      B21 2      A20 1      D19
H      22     B22 3      A21 2      D20
H      22     B23 3      A22 2      D21
H      22     B24 3      A23 2      D22

```

```

B1      1.455741
B2      1.276237
B3      2.239701
B4      3.182107
B5      1.360697
B6      1.360724
B7      1.015077
B8      1.689246
B9      1.449707
B10     1.449708
B11     1.095109
B12     1.095077

```

|     |             |
|-----|-------------|
| B13 | 1.095523    |
| B14 | 1.095273    |
| B15 | 1.093754    |
| B16 | 1.095671    |
| B17 | 1.093286    |
| B18 | 1.093715    |
| B19 | 1.093289    |
| B20 | 1.095708    |
| B21 | 1.504538    |
| B22 | 1.096302    |
| B23 | 1.096289    |
| B24 | 1.089971    |
| A1  | 122.568110  |
| A2  | 125.590662  |
| A3  | 132.352264  |
| A4  | 101.892446  |
| A5  | 113.793423  |
| A6  | 117.226997  |
| A7  | 123.099027  |
| A8  | 123.695380  |
| A9  | 134.262370  |
| A10 | 108.509599  |
| A11 | 108.503048  |
| A12 | 115.769535  |
| A13 | 114.856042  |
| A14 | 111.033669  |
| A15 | 111.775786  |
| A16 | 108.033520  |
| A17 | 111.016624  |
| A18 | 108.035103  |
| A19 | 111.789957  |
| A20 | 130.784654  |
| A21 | 109.221987  |
| A22 | 109.229639  |
| A23 | 114.402737  |
| D1  | 145.373132  |
| D2  | 151.123449  |
| D3  | 114.066421  |
| D4  | -6.217759   |
| D5  | -4.120913   |
| D6  | 173.088171  |
| D7  | -177.574987 |
| D8  | -70.440674  |
| D9  | -122.004795 |
| D10 | 122.363105  |
| D11 | 0.180566    |
| D12 | -179.995330 |
| D13 | -116.416000 |
| D14 | 123.524546  |
| D15 | 3.368130    |
| D16 | -58.144599  |
| D17 | -177.922986 |
| D18 | 61.914645   |
| D19 | 0.008921    |
| D20 | 121.933831  |
| D21 | -122.013128 |

D22        -0.032016

1 2 1.0 12 1.0 13 1.0 14 1.0  
 2 3 2.0  
 3 15 1.0 22 1.0  
 4 5 1.0  
 5 6 1.5 11 1.0  
 6 7 1.5 9 1.0  
 7 8 1.0 10 1.0  
 8  
 9  
 10 19 1.0 20 1.0 21 1.0  
 11 16 1.0 17 1.0 18 1.0  
 12  
 13  
 14  
 15  
 16  
 17  
 18  
 19  
 20  
 21  
 22 23 1.0 24 1.0 25 1.0  
 23  
 24  
 25

Selected example of the resulting Z-matrix for imine-Strecker adduct complex (2-methylamino propionitrile and *N,N'*-dimethylthiourea; Figure 2b in the main text):

|   |    |     |    |     |   |
|---|----|-----|----|-----|---|
| 0 | 1  |     |    |     |   |
| C |    |     |    |     |   |
| H | 1  | B1  |    |     |   |
| N | 1  | B2  | 2  | A1  |   |
| C | 3  | B3  | 1  | A2  | 2 |
| N | 4  | B4  | 3  | A3  | 1 |
| H | 5  | B5  | 4  | A4  | 3 |
| S | 4  | B6  | 3  | A5  | 1 |
| C | 5  | B7  | 4  | A6  | 3 |
| C | 3  | B8  | 1  | A7  | 2 |
| H | 1  | B9  | 2  | A8  | 3 |
| H | 1  | B10 | 2  | A9  | 3 |
| H | 1  | B11 | 2  | A10 | 3 |
| H | 9  | B12 | 3  | A11 | 1 |
| H | 9  | B13 | 3  | A12 | 1 |
| H | 9  | B14 | 3  | A13 | 1 |
| H | 8  | B15 | 5  | A14 | 4 |
| H | 8  | B16 | 5  | A15 | 4 |
| H | 8  | B17 | 5  | A16 | 4 |
| C | 1  | B18 | 2  | A17 | 3 |
| H | 19 | B19 | 1  | A18 | 2 |
| H | 19 | B20 | 1  | A19 | 2 |
| H | 19 | B21 | 1  | A20 | 2 |
| C | 19 | B22 | 1  | A21 | 2 |
| H | 23 | B23 | 19 | A22 | 1 |

|   |    |     |    |     |    |     |
|---|----|-----|----|-----|----|-----|
| N | 1  | B24 | 2  | A23 | 3  | D22 |
| H | 25 | B25 | 1  | A24 | 2  | D23 |
| C | 23 | B26 | 19 | A25 | 1  | D24 |
| N | 27 | B27 | 23 | A26 | 19 | D25 |

|     |            |
|-----|------------|
| B1  | 3.015224   |
| B2  | 3.982588   |
| B3  | 1.358746   |
| B4  | 1.380058   |
| B5  | 1.012098   |
| B6  | 1.681411   |
| B7  | 1.457016   |
| B8  | 1.452368   |
| B9  | 1.092331   |
| B10 | 1.092583   |
| B11 | 1.099270   |
| B12 | 1.092398   |
| B13 | 1.093065   |
| B14 | 1.096532   |
| B15 | 1.093225   |
| B16 | 1.096564   |
| B17 | 1.090685   |
| B18 | 3.073710   |
| B19 | 1.092105   |
| B20 | 1.092413   |
| B21 | 1.092307   |
| B22 | 1.535576   |
| B23 | 1.096264   |
| B24 | 1.472183   |
| B25 | 1.018212   |
| B26 | 1.484711   |
| B27 | 1.161474   |
| A1  | 5.512924   |
| A2  | 131.282634 |
| A3  | 113.197265 |
| A4  | 114.455632 |
| A5  | 123.871734 |
| A6  | 122.064513 |
| A7  | 101.118426 |
| A8  | 83.650648  |
| A9  | 89.853187  |
| A10 | 152.593929 |
| A11 | 110.366289 |
| A12 | 108.053573 |
| A13 | 112.276654 |
| A14 | 108.047715 |
| A15 | 112.514361 |
| A16 | 109.760351 |
| A17 | 62.780331  |
| A18 | 96.404969  |
| A19 | 154.142282 |
| A20 | 68.046398  |
| A21 | 53.704771  |
| A22 | 107.803439 |
| A23 | 39.641127  |
| A24 | 107.966420 |



|     |             |
|-----|-------------|
| A25 | 110.905524  |
| A26 | 177.230410  |
| D1  | 35.971619   |
| D2  | -28.271400  |
| D3  | -25.964968  |
| D4  | 151.056784  |
| D5  | -172.277881 |
| D6  | -168.998991 |
| D7  | 18.902969   |
| D8  | -88.919579  |
| D9  | 137.675719  |
| D10 | 146.593476  |
| D11 | 27.194684   |
| D12 | -93.495556  |
| D13 | -177.415610 |
| D14 | 61.540940   |
| D15 | -58.412203  |
| D16 | 85.971445   |
| D17 | -29.522778  |
| D18 | 136.293714  |
| D19 | -137.815655 |
| D20 | 79.665522   |
| D21 | -145.725867 |
| D22 | 151.264711  |
| D23 | 118.891813  |
| D24 | 97.026468   |
| D25 | -132.139643 |

1 10 1.0 11 1.0 12 1.0 25 1.0  
 2 3 1.0  
 3 4 1.5 9 1.0  
 4 5 1.5 7 1.0  
 5 6 1.0 8 1.0  
 6  
 7  
 8 16 1.0 17 1.0 18 1.0  
 9 13 1.0 14 1.0 15 1.0  
 10  
 11  
 12  
 13  
 14  
 15  
 16  
 17  
 18  
 19 20 1.0 21 1.0 22 1.0 23 1.0  
 20  
 21  
 22  
 23 24 1.0 25 1.0 27 1.0  
 24  
 25 26 1.0  
 26  
 27 28 3.0  
 28

Optimization to the energy minimum of a catalyst **6** derivative using Gaussian 98; method B3LYP; basis set 3-21G\* (gas phase) provided the same structure that was observed by NMR spectroscopy in solution (Figure 1a of the text). Following is the figure (all hydrogens omitted for clarity) of the calculated structure and the resulting Z-matrix (including hydrogens).

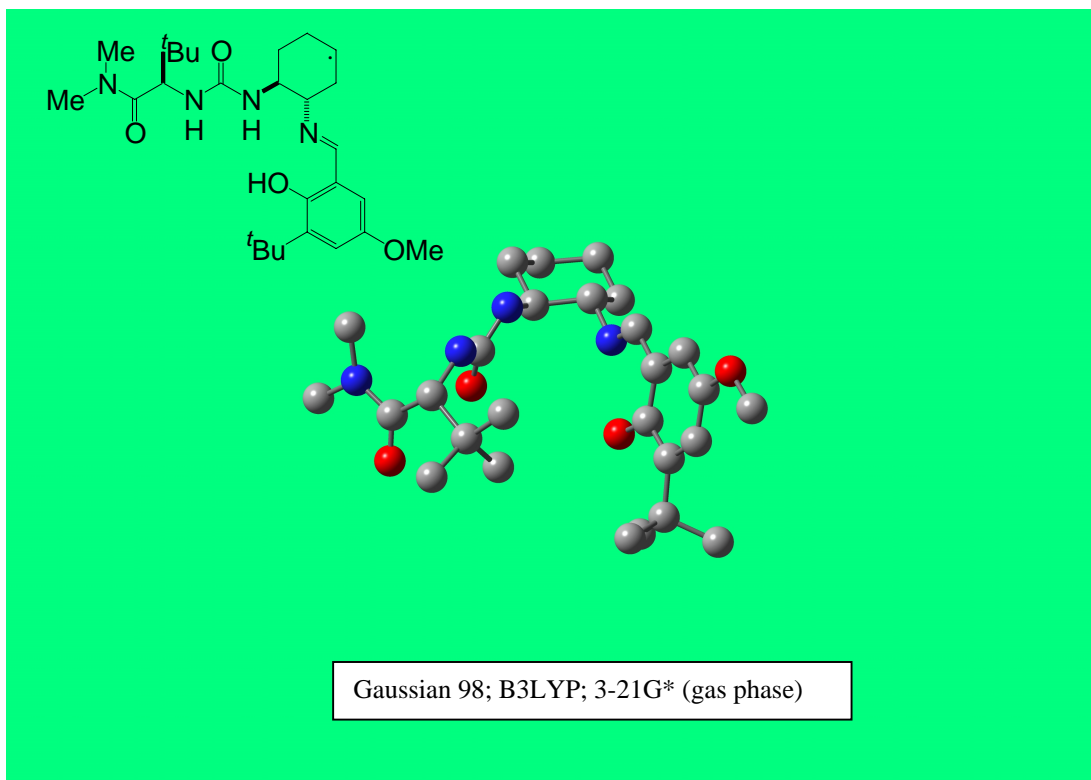

Symbolic Z-matrix:

```

0 1
N
C      1  B1
O      2  B2      1  A1
C      2  B3      1  A2      3  D1      0
C      4  B4      2  A3      1  D2      0
N      4  B5      2  A4      1  D3      0
C      5  B6      4  A5      2  D4      0
C      5  B7      4  A6      2  D5      0
C      5  B8      4  A7      2  D6      0
C      6  B9      4  A8      2  D7      0
O     10  B10     6  A9      4  D8      0
N     10  B11     6  A10     4  D9      0
C     12  B12    10  A11     6  D10     0
H      6  B13     4  A12     2  D11     0
H     12  B14    10  A13     6  D12     0
C     13  B15    12  A14    10  D13     0
C     13  B16    12  A15    10  D14     0
C     16  B17    13  A16    12  D15     0
C     13  B18    12  A17    10  D16     0
C     16  B19    13  A18    12  D17     0
N     20  B20    16  A19    13  D18     0

```

|   |    |     |    |     |    |     |   |
|---|----|-----|----|-----|----|-----|---|
| C | 21 | B21 | 20 | A20 | 16 | D19 | 0 |
| C | 22 | B22 | 21 | A21 | 20 | D20 | 0 |
| C | 23 | B23 | 22 | A22 | 21 | D21 | 0 |
| C | 24 | B24 | 23 | A23 | 22 | D22 | 0 |
| C | 25 | B25 | 24 | A24 | 23 | D23 | 0 |
| C | 26 | B26 | 25 | A25 | 24 | D24 | 0 |
| C | 27 | B27 | 26 | A26 | 25 | D25 | 0 |
| O | 25 | B28 | 24 | A27 | 23 | D26 | 0 |
| O | 28 | B29 | 27 | A28 | 26 | D27 | 0 |
| C | 27 | B30 | 26 | A29 | 25 | D28 | 0 |
| C | 31 | B31 | 27 | A30 | 26 | D29 | 0 |
| C | 31 | B32 | 27 | A31 | 26 | D30 | 0 |
| H | 33 | B33 | 31 | A32 | 27 | D31 | 0 |
| H | 4  | B34 | 2  | A33 | 1  | D32 | 0 |
| H | 7  | B35 | 5  | A34 | 4  | D33 | 0 |
| H | 7  | B36 | 5  | A35 | 4  | D34 | 0 |
| H | 7  | B37 | 5  | A36 | 4  | D35 | 0 |
| H | 8  | B38 | 5  | A37 | 4  | D36 | 0 |
| H | 8  | B39 | 5  | A38 | 4  | D37 | 0 |
| H | 8  | B40 | 5  | A39 | 4  | D38 | 0 |
| H | 9  | B41 | 5  | A40 | 4  | D39 | 0 |
| H | 9  | B42 | 5  | A41 | 4  | D40 | 0 |
| H | 9  | B43 | 5  | A42 | 4  | D41 | 0 |
| H | 18 | B44 | 16 | A43 | 13 | D42 | 0 |
| H | 18 | B45 | 16 | A44 | 13 | D43 | 0 |
| H | 19 | B46 | 13 | A45 | 12 | D44 | 0 |
| H | 19 | B47 | 13 | A46 | 12 | D45 | 0 |
| H | 20 | B48 | 16 | A47 | 13 | D46 | 0 |
| H | 22 | B49 | 21 | A48 | 20 | D47 | 0 |
| H | 24 | B50 | 23 | A49 | 22 | D48 | 0 |
| H | 26 | B51 | 25 | A50 | 24 | D49 | 0 |
| H | 30 | B52 | 28 | A51 | 27 | D50 | 0 |
| H | 32 | B53 | 31 | A52 | 27 | D51 | 0 |
| H | 32 | B54 | 31 | A53 | 27 | D52 | 0 |
| H | 33 | B55 | 31 | A54 | 27 | D53 | 0 |
| H | 33 | B56 | 31 | A55 | 27 | D54 | 0 |
| H | 32 | B57 | 31 | A56 | 27 | D55 | 0 |
| C | 31 | B58 | 27 | A57 | 26 | D56 | 0 |
| H | 59 | B59 | 31 | A58 | 27 | D57 | 0 |
| H | 59 | B60 | 31 | A59 | 27 | D58 | 0 |
| H | 59 | B61 | 31 | A60 | 27 | D59 | 0 |
| H | 13 | B62 | 12 | A61 | 10 | D60 | 0 |
| H | 17 | B63 | 13 | A62 | 12 | D61 | 0 |
| H | 17 | B64 | 13 | A63 | 12 | D62 | 0 |
| H | 16 | B65 | 13 | A64 | 12 | D63 | 0 |
| H | 16 | B66 | 13 | A65 | 12 | D64 | 0 |
| C | 1  | B67 | 2  | A66 | 3  | D65 | 0 |
| H | 68 | B68 | 1  | A67 | 2  | D66 | 0 |
| H | 68 | B69 | 1  | A68 | 2  | D67 | 0 |
| H | 68 | B70 | 1  | A69 | 2  | D68 | 0 |
| C | 1  | B71 | 2  | A70 | 3  | D69 | 0 |
| H | 72 | B72 | 1  | A71 | 2  | D70 | 0 |
| H | 72 | B73 | 1  | A72 | 2  | D71 | 0 |
| H | 72 | B74 | 1  | A73 | 2  | D72 | 0 |
| C | 29 | B75 | 25 | A74 | 24 | D73 | 0 |
| H | 76 | B76 | 29 | A75 | 25 | D74 | 0 |

|   |    |     |    |     |    |     |   |
|---|----|-----|----|-----|----|-----|---|
| H | 76 | B77 | 29 | A76 | 25 | D75 | 0 |
| H | 76 | B78 | 29 | A77 | 25 | D76 | 0 |

Variables:

|     |         |
|-----|---------|
| B1  | 1.37791 |
| B2  | 1.24688 |
| B3  | 1.55597 |
| B4  | 1.56422 |
| B5  | 1.47848 |
| B6  | 1.54778 |
| B7  | 1.54895 |
| B8  | 1.55018 |
| B9  | 1.38729 |
| B10 | 1.24336 |
| B11 | 1.38548 |
| B12 | 1.46434 |
| B13 | 1.01527 |
| B14 | 1.01401 |
| B15 | 2.53026 |
| B16 | 2.54031 |
| B17 | 1.54479 |
| B18 | 1.54286 |
| B19 | 1.54554 |
| B20 | 1.47683 |
| B21 | 1.29382 |
| B22 | 1.45107 |
| B23 | 1.39859 |
| B24 | 1.38629 |
| B25 | 1.39909 |
| B26 | 1.40071 |
| B27 | 1.41578 |
| B28 | 1.3935  |
| B29 | 1.36153 |
| B30 | 1.54993 |
| B31 | 1.55589 |
| B32 | 1.55098 |
| B33 | 1.08826 |
| B34 | 1.10009 |
| B35 | 1.09735 |
| B36 | 1.0887  |
| B37 | 1.09283 |
| B38 | 1.09921 |
| B39 | 1.09551 |
| B40 | 1.09531 |
| B41 | 1.0988  |
| B42 | 1.09591 |
| B43 | 1.09017 |
| B44 | 1.09879 |
| B45 | 1.09617 |
| B46 | 1.09994 |
| B47 | 1.09523 |
| B48 | 1.10475 |
| B49 | 1.09757 |
| B50 | 1.08328 |
| B51 | 1.0804  |
| B52 | 1.055   |
| B53 | 1.09439 |

|     |           |
|-----|-----------|
| B54 | 1.09523   |
| B55 | 1.09279   |
| B56 | 1.09692   |
| B57 | 1.0961    |
| B58 | 1.55391   |
| B59 | 1.09689   |
| B60 | 1.09564   |
| B61 | 1.09447   |
| B62 | 1.094     |
| B63 | 1.09803   |
| B64 | 1.09624   |
| B65 | 1.09681   |
| B66 | 1.09584   |
| B67 | 1.47366   |
| B68 | 1.09641   |
| B69 | 1.08928   |
| B70 | 1.09786   |
| B71 | 1.46721   |
| B72 | 1.09937   |
| B73 | 1.08652   |
| B74 | 1.09772   |
| B75 | 1.45621   |
| B76 | 1.09765   |
| B77 | 1.09757   |
| B78 | 1.09065   |
| A1  | 120.72517 |
| A2  | 117.01515 |
| A3  | 113.81247 |
| A4  | 111.00832 |
| A5  | 113.23394 |
| A6  | 108.2498  |
| A7  | 108.23234 |
| A8  | 121.15722 |
| A9  | 123.14424 |
| A10 | 114.12773 |
| A11 | 119.17522 |
| A12 | 116.14609 |
| A13 | 121.48891 |
| A14 | 146.10246 |
| A15 | 146.98971 |
| A16 | 90.31198  |
| A17 | 112.36749 |
| A18 | 35.10283  |
| A19 | 110.03427 |
| A20 | 119.82911 |
| A21 | 122.75859 |
| A22 | 118.95156 |
| A23 | 120.00438 |
| A24 | 118.63279 |
| A25 | 123.49792 |
| A26 | 117.77938 |
| A27 | 116.41702 |
| A28 | 121.9508  |
| A29 | 117.12898 |
| A30 | 109.49413 |
| A31 | 114.88095 |

|     |            |
|-----|------------|
| A32 | 111.63737  |
| A33 | 106.14158  |
| A34 | 108.32793  |
| A35 | 109.40145  |
| A36 | 112.63195  |
| A37 | 111.32942  |
| A38 | 109.19633  |
| A39 | 111.19055  |
| A40 | 110.77232  |
| A41 | 109.45774  |
| A42 | 109.47194  |
| A43 | 109.24995  |
| A44 | 109.6469   |
| A45 | 109.32544  |
| A46 | 108.55464  |
| A47 | 109.06709  |
| A48 | 121.22349  |
| A49 | 120.99213  |
| A50 | 118.65008  |
| A51 | 107.99163  |
| A52 | 112.33078  |
| A53 | 110.16859  |
| A54 | 111.12335  |
| A55 | 107.79737  |
| A56 | 109.09485  |
| A57 | 108.38429  |
| A58 | 109.77108  |
| A59 | 111.22957  |
| A60 | 109.93512  |
| A61 | 104.3915   |
| A62 | 91.61034   |
| A63 | 144.68439  |
| A64 | 90.01697   |
| A65 | 144.30072  |
| A66 | 117.62067  |
| A67 | 110.01124  |
| A68 | 107.0382   |
| A69 | 110.48987  |
| A70 | 127.17575  |
| A71 | 110.77438  |
| A72 | 110.32411  |
| A73 | 109.28869  |
| A74 | 117.90664  |
| A75 | 111.90703  |
| A76 | 111.90925  |
| A77 | 104.98726  |
| D1  | -174.97216 |
| D2  | 172.92094  |
| D3  | -57.19889  |
| D4  | 59.89443   |
| D5  | -179.02921 |
| D6  | -62.01234  |
| D7  | -43.70959  |
| D8  | 3.33987    |
| D9  | -177.73844 |
| D10 | 173.51594  |

|     |            |
|-----|------------|
| D11 | 158.16273  |
| D12 | -6.73402   |
| D13 | -115.98529 |
| D14 | 112.87055  |
| D15 | -134.24379 |
| D16 | 115.71943  |
| D17 | -7.16314   |
| D18 | 120.09487  |
| D19 | 114.57599  |
| D20 | 179.88701  |
| D21 | 178.35154  |
| D22 | -179.67675 |
| D23 | 1.10892    |
| D24 | -0.48953   |
| D25 | -1.28705   |
| D26 | -179.23457 |
| D27 | -177.33593 |
| D28 | -179.95149 |
| D29 | -50.84911  |
| D30 | -170.8978  |
| D31 | -62.63932  |
| D32 | 56.80967   |
| D33 | -173.62152 |
| D34 | -54.23142  |
| D35 | 67.57077   |
| D36 | 56.97602   |
| D37 | 176.23957  |
| D38 | -65.31227  |
| D39 | -56.82477  |
| D40 | -175.9341  |
| D41 | 64.0879    |
| D42 | 93.0285    |
| D43 | -149.37133 |
| D44 | 61.94659   |
| D45 | -55.59575  |
| D46 | -119.5129  |
| D47 | -0.38606   |
| D48 | 0.31102    |
| D49 | 179.53152  |
| D50 | -176.48374 |
| D51 | 61.13493   |
| D52 | -60.08847  |
| D53 | 57.84253   |
| D54 | 177.09801  |
| D55 | -179.2681  |
| D56 | 68.2336    |
| D57 | -177.92236 |
| D58 | -57.68025  |
| D59 | 62.70808   |
| D60 | -3.05731   |
| D61 | -117.3486  |
| D62 | 6.99653    |
| D63 | 115.55696  |
| D64 | -6.28774   |
| D65 | -4.32683   |
| D66 | -122.99338 |

|     |            |
|-----|------------|
| D67 | -3.00875   |
| D68 | 116.57464  |
| D69 | 170.83295  |
| D70 | -107.78505 |
| D71 | 14.62921   |
| D72 | 133.33393  |
| D73 | -179.81204 |
| D74 | -61.34278  |
| D75 | 61.34813   |
| D76 | -179.99249 |

Z-matrix for the catalyst-imine complex (including hydrogens); Figure 2b-c of the main text:

```

0 1
C
N      1      1.455100
C      2      1.307659      1      120.326986
O      3      1.217380      2      124.951408      1      0.150436
C      3      1.537574      2      113.113208      1      -179.982473
C      5      1.547259      3      111.304327      2      121.863903
N      5      1.464335      3      110.818912      2      -115.964654
C      6      1.537108      5      110.094633      3      61.342520
C      6      1.530865      5      109.663057      3      -178.541730
C      6      1.533359      5      109.590417      3      -58.870713
C      7      1.315610      5      120.314565      3      -10.053245
O      11     1.215877      7      120.721550      5      -0.005474
N      11     1.319129      7      119.034418      5      -179.990229
C      13     1.466249      11     122.751257      7      179.840369
H      7      1.011999      5      119.597747      3      169.883662
N      13     2.904829      11     100.906104      7      -0.019423
C      14     2.503556      13     144.236575      11     -125.366467
C      14     2.493638      13     144.759766      11     115.671826
C      18     1.531964      14     90.072562      13     124.005363
C      14     1.529160      13     109.292019      11     115.369939
C      14     1.529334      13     109.066819      11     -124.952615
C      1      1.436670      2      112.630728      3      176.434088
C      22     1.405807      1      120.034799      2      179.997704
C      23     1.404255      22     119.919026      1      179.993126
C      24     1.404425      23     120.015986      22     -0.009202
C      25     1.404770      24     120.046423      23     -0.081602
C      22     1.403141      1      119.944134      2      -0.069812
N      21     1.431013      14     108.705660      13     60.147439
C      28     1.339587      21     119.989678      14     -119.783391
C      29     1.320516      28     122.036228      21     179.957090
C      30     1.404100      29     120.429102      28     179.974290
C      31     1.405305      30     119.940692      29     179.950946
C      32     1.404137      31     120.067753      30     0.112073
C      33     1.403600      32     119.956263      31     -0.108519
C      34     1.404311      33     120.046419      32     0.101346
O      32     1.392087      31     119.942920      30     179.960959
O      35     1.391273      34     120.038204      33     179.995640
C      36     1.315207      32     106.044677      31     -179.949661
O      38     1.207858      36     119.918747      32     0.134995
C      38     1.448154      36     118.521426      32     -179.912822
C      40     1.544513      38     107.343896      36     -179.762586

```



|   |    |          |    |            |    |             |
|---|----|----------|----|------------|----|-------------|
| C | 40 | 1.542914 | 38 | 110.411370 | 36 | 61.565281   |
| C | 40 | 1.543116 | 38 | 110.761871 | 36 | -59.246233  |
| C | 34 | 1.449602 | 33 | 118.942088 | 32 | 179.978131  |
| C | 44 | 1.542961 | 34 | 109.164788 | 33 | -59.938961  |
| C | 44 | 1.544605 | 34 | 110.275620 | 33 | 59.669479   |
| C | 44 | 1.542991 | 34 | 108.950032 | 33 | -178.935849 |
| C | 16 | 1.279505 | 13 | 117.405295 | 11 | 103.108901  |
| H | 13 | 1.013096 | 11 | 118.574677 | 7  | -0.038520   |
| C | 16 | 1.471633 | 13 | 117.445992 | 11 | -101.842503 |
| C | 48 | 1.531949 | 16 | 119.998372 | 13 | 154.970391  |
| C | 48 | 1.530919 | 16 | 119.986104 | 13 | -25.104829  |
| C | 51 | 2.771308 | 16 | 153.003071 | 13 | 138.431560  |
| C | 51 | 1.385864 | 48 | 119.979739 | 16 | -0.081275   |
| C | 51 | 1.387154 | 48 | 119.957641 | 16 | 179.957536  |
| C | 55 | 1.385165 | 51 | 119.981485 | 48 | 179.989198  |
| C | 53 | 1.385803 | 51 | 59.990805  | 54 | 0.017075    |
| C | 50 | 1.531473 | 16 | 109.436884 | 13 | 25.604244   |
| C | 58 | 1.332800 | 50 | 119.960560 | 16 | -179.702030 |
| H | 1  | B1       | 2  | A1         | 3  | D1          |
| H | 5  | B2       | 3  | A2         | 2  | D2          |
| H | 8  | B3       | 6  | A3         | 5  | D3          |
| H | 8  | B4       | 6  | A4         | 5  | D4          |
| H | 8  | B5       | 6  | A5         | 5  | D5          |
| H | 9  | B6       | 6  | A6         | 5  | D6          |
| H | 9  | B7       | 6  | A7         | 5  | D7          |
| H | 9  | B8       | 6  | A8         | 5  | D8          |
| H | 10 | B9       | 6  | A9         | 5  | D9          |
| H | 10 | B10      | 6  | A10        | 5  | D10         |
| H | 10 | B11      | 6  | A11        | 5  | D11         |
| H | 14 | B12      | 13 | A12        | 11 | D12         |
| H | 17 | B13      | 14 | A13        | 13 | D13         |
| H | 17 | B14      | 14 | A14        | 13 | D14         |
| H | 18 | B15      | 14 | A15        | 13 | D15         |
| H | 18 | B16      | 14 | A16        | 13 | D16         |
| H | 19 | B17      | 18 | A17        | 14 | D17         |
| H | 19 | B18      | 18 | A18        | 14 | D18         |
| H | 20 | B19      | 14 | A19        | 13 | D19         |
| H | 20 | B20      | 14 | A20        | 13 | D20         |
| H | 21 | B21      | 14 | A21        | 13 | D21         |
| H | 23 | B22      | 22 | A22        | 1  | D22         |
| H | 24 | B23      | 23 | A23        | 22 | D23         |
| H | 25 | B24      | 24 | A24        | 23 | D24         |
| H | 26 | B25      | 25 | A25        | 24 | D25         |
| H | 27 | B26      | 22 | A26        | 1  | D26         |
| H | 29 | B27      | 28 | A27        | 21 | D27         |
| H | 31 | B28      | 30 | A28        | 29 | D28         |
| H | 33 | B29      | 32 | A29        | 31 | D29         |
| H | 37 | B30      | 35 | A30        | 34 | D30         |
| H | 41 | B31      | 40 | A31        | 38 | D31         |
| H | 41 | B32      | 40 | A32        | 38 | D32         |
| H | 41 | B33      | 40 | A33        | 38 | D33         |
| H | 42 | B34      | 40 | A34        | 38 | D34         |
| H | 42 | B35      | 40 | A35        | 38 | D35         |
| H | 42 | B36      | 40 | A36        | 38 | D36         |
| H | 43 | B37      | 40 | A37        | 38 | D37         |
| H | 43 | B38      | 40 | A38        | 38 | D38         |

|   |    |     |    |     |    |     |
|---|----|-----|----|-----|----|-----|
| H | 43 | B39 | 40 | A39 | 38 | D39 |
| H | 45 | B40 | 44 | A40 | 34 | D40 |
| H | 45 | B41 | 44 | A41 | 34 | D41 |
| H | 45 | B42 | 44 | A42 | 34 | D42 |
| H | 46 | B43 | 44 | A43 | 34 | D43 |
| H | 46 | B44 | 44 | A44 | 34 | D44 |
| H | 46 | B45 | 44 | A45 | 34 | D45 |
| H | 47 | B46 | 44 | A46 | 34 | D46 |
| H | 47 | B47 | 44 | A47 | 34 | D47 |
| H | 47 | B48 | 44 | A48 | 34 | D48 |
| H | 50 | B49 | 16 | A49 | 13 | D49 |
| H | 50 | B50 | 16 | A50 | 13 | D50 |
| H | 52 | B51 | 48 | A51 | 16 | D51 |
| H | 52 | B52 | 48 | A52 | 16 | D52 |
| H | 52 | B53 | 48 | A53 | 16 | D53 |
| H | 53 | B54 | 57 | A54 | 54 | D54 |
| H | 54 | B55 | 51 | A55 | 48 | D55 |
| H | 55 | B56 | 51 | A56 | 48 | D56 |
| H | 56 | B57 | 55 | A57 | 51 | D57 |
| H | 57 | B58 | 53 | A58 | 51 | D58 |
| H | 58 | B59 | 50 | A59 | 16 | D59 |
| H | 59 | B60 | 58 | A60 | 50 | D60 |
| H | 59 | B61 | 58 | A61 | 50 | D61 |

|     |          |
|-----|----------|
| B1  | 1.070000 |
| B2  | 1.070000 |
| B3  | 1.070000 |
| B4  | 1.070000 |
| B5  | 1.070000 |
| B6  | 1.070000 |
| B7  | 1.070000 |
| B8  | 1.070000 |
| B9  | 1.070000 |
| B10 | 1.070000 |
| B11 | 1.070000 |
| B12 | 1.070000 |
| B13 | 1.070000 |
| B14 | 1.070000 |
| B15 | 1.070000 |
| B16 | 1.070000 |
| B17 | 1.070000 |
| B18 | 1.070000 |
| B19 | 1.070000 |
| B20 | 1.070000 |
| B21 | 1.070000 |
| B22 | 1.070000 |
| B23 | 1.070000 |
| B24 | 1.070000 |
| B25 | 1.070000 |
| B26 | 1.070000 |
| B27 | 1.070000 |
| B28 | 1.070000 |
| B29 | 1.070000 |
| B30 | 0.960000 |
| B31 | 1.070000 |
| B32 | 1.070000 |

|     |            |
|-----|------------|
| B33 | 1.070000   |
| B34 | 1.070000   |
| B35 | 1.070000   |
| B36 | 1.070000   |
| B37 | 1.070000   |
| B38 | 1.070000   |
| B39 | 1.070000   |
| B40 | 1.070000   |
| B41 | 1.070000   |
| B42 | 1.070000   |
| B43 | 1.070000   |
| B44 | 1.070000   |
| B45 | 1.070000   |
| B46 | 1.070000   |
| B47 | 1.070000   |
| B48 | 1.070000   |
| B49 | 1.070000   |
| B50 | 1.070000   |
| B51 | 1.070000   |
| B52 | 1.070000   |
| B53 | 1.070000   |
| B54 | 1.070000   |
| B55 | 1.070000   |
| B56 | 1.070000   |
| B57 | 1.070000   |
| B58 | 1.070000   |
| B59 | 1.070000   |
| B60 | 1.070000   |
| B61 | 1.070000   |
| A1  | 123.684636 |
| A2  | 107.311453 |
| A3  | 109.471221 |
| A4  | 109.471221 |
| A5  | 109.471221 |
| A6  | 109.471221 |
| A7  | 109.471221 |
| A8  | 109.471221 |
| A9  | 109.471221 |
| A10 | 109.471221 |
| A11 | 109.471221 |
| A12 | 109.866854 |
| A13 | 141.765216 |
| A14 | 85.675338  |
| A15 | 85.029188  |
| A16 | 142.112676 |
| A17 | 106.813008 |
| A18 | 106.813008 |
| A19 | 106.852493 |
| A20 | 106.852493 |
| A21 | 109.971157 |
| A22 | 120.040487 |
| A23 | 119.992007 |
| A24 | 119.976788 |
| A25 | 120.041946 |
| A26 | 119.959342 |
| A27 | 118.981886 |

|     |             |
|-----|-------------|
| A28 | 120.029654  |
| A29 | 120.021868  |
| A30 | 109.471221  |
| A31 | 109.471221  |
| A32 | 109.471221  |
| A33 | 109.471221  |
| A34 | 109.471221  |
| A35 | 109.471221  |
| A36 | 109.471221  |
| A37 | 109.471221  |
| A38 | 109.471221  |
| A39 | 109.471221  |
| A40 | 109.471221  |
| A41 | 109.471221  |
| A42 | 109.471221  |
| A43 | 109.471221  |
| A44 | 109.471221  |
| A45 | 109.471221  |
| A46 | 109.471221  |
| A47 | 109.471221  |
| A48 | 109.471221  |
| A49 | 106.785975  |
| A50 | 106.785975  |
| A51 | 109.471221  |
| A52 | 109.471221  |
| A53 | 109.471221  |
| A54 | 119.991139  |
| A55 | 120.045682  |
| A56 | 120.009257  |
| A57 | 120.007307  |
| A58 | 119.977930  |
| A59 | 120.019720  |
| A60 | 120.000000  |
| A61 | 120.000000  |
| D1  | -3.565912   |
| D2  | 3.118839    |
| D3  | 180.000000  |
| D4  | 60.000000   |
| D5  | -60.000000  |
| D6  | -180.000000 |
| D7  | 60.000000   |
| D8  | -60.000000  |
| D9  | 180.000000  |
| D10 | -60.000000  |
| D11 | 60.000000   |
| D12 | -4.723939   |
| D13 | -7.064176   |
| D14 | 128.516025  |
| D15 | -129.103199 |
| D16 | 5.765422    |
| D17 | -84.663267  |
| D18 | 145.771523  |
| D19 | 64.507789   |
| D20 | -65.108182  |
| D21 | -60.026839  |
| D22 | -0.006874   |

|     |             |
|-----|-------------|
| D23 | 179.990798  |
| D24 | 179.918398  |
| D25 | -179.879157 |
| D26 | 0.046110    |
| D27 | -0.042910   |
| D28 | -0.049054   |
| D29 | 179.891481  |
| D30 | -10.884943  |
| D31 | -180.000000 |
| D32 | -60.000000  |
| D33 | 60.000000   |
| D34 | -180.000000 |
| D35 | 60.000000   |
| D36 | -60.000000  |
| D37 | 180.000000  |
| D38 | -60.000000  |
| D39 | 60.000000   |
| D40 | 0.000000    |
| D41 | 120.000000  |
| D42 | -120.000000 |
| D43 | 0.000000    |
| D44 | -120.000000 |
| D45 | 120.000000  |
| D46 | -180.000000 |
| D47 | -60.000000  |
| D48 | 60.000000   |
| D49 | 140.838962  |
| D50 | -89.630475  |
| D51 | 179.999998  |
| D52 | -60.000000  |
| D53 | 60.000000   |
| D54 | 179.954276  |
| D55 | 0.013566    |
| D56 | -0.010802   |
| D57 | 179.960425  |
| D58 | 179.982915  |
| D59 | 0.297970    |
| D60 | -0.000001   |
| D61 | 180.000000  |

## Notes and References

- (1) (a) Larrow, J. F.; Jacobsen, E. N.; Gao, Y.; Hong, Y.; Nie, X.; Zepp, C. M. *J. Org. Chem.* **1994**, *59*, 1939; (b) Larrow, J.F.; Jacobsen, E.N. *Org. Synth.* **1997**, vol. 75, 1.
- (2) (a) Sigman, M.S.; Jacobsen, E.N. *J. Am. Chem. Soc.* **1998**, *120*, 4901; (b) Sigman, M.S.; Vachal, P.; Jacobsen, E.N. *Angew. Chem. Int. Ed.* **2000**, *39*, 1279; (c) Vachal, P.; Jacobsen, E.N. *Org. Lett.* **2000**, *2*, 867.
- (3) Cappon, J.J.; Witters, K.D.; Baart, J.; Verdegem, P.J.E.; Hoek, A.C. *Recl. Trav. Chim. Pays-Bas* **1994**, *113*, 318.
- (4) (a) Su, J.T.; Vachal, P.; Jacobsen, E.N. *Adv. Synth. Catal.* **2001**, *343*, 197; (b) Su, J.T.; Vachal, P.; Jacobsen, E.N. *Org Synth.*, submitted.
- (5) The procedure for the thiourea formation is based on: Wenzel, A.; Jacobsen, E.N. *Unpublished results*.

- 
- (6) Gaussian 98 (version 5.4), M. J. Frisch, G. W. Trucks, H. B. Schlegel, G. E. Scuseria, M. A. Robb, J. R. Cheeseman, V. G. Zakrzewski, J. A. Montgomery, Jr., R. E. Stratmann, J. C. Burant, S. Dapprich, J. M. Millam, A. D. Daniels, K. N. Kudin, M. C. Strain, O. Farkas, J. Tomasi, V. Barone, M. Cossi, R. Cammi, B. Mennucci, C. Pomelli, C. Adamo, S. Clifford, J. Ochterski, G. A. Petersson, P. Y. Ayala, Q. Cui, K. Morokuma, P. Salvador, J. J. Dannenberg, D. K. Malick, A. D. Rabuck, K. Raghavachari, J. B. Foresman, J. Cioslowski, J. V. Ortiz, A. G. Baboul, B. B. Stefanov, G. Liu, A. Liashenko, P. Piskorz, I. Komaromi, R. Gomperts, R. L. Martin, D. J. Fox, T. Keith, M. A. Al-Laham, C. Y. Peng, A. Nanayakkara, M. Challacombe, P. M. W. Gill, B. Johnson, W. Chen, M. W. Wong, J. L. Andres, C. Gonzalez, M. Head-Gordon, E. S. Replogle, and J. A. Pople, Gaussian, Inc., Pittsburgh PA, 2001.
- (7) Koradi, R.; Billeter, M.; Wüthrich, K. *J Mol Graphics* **1996**, *14*, 51: MOLMOL: a program for display and analysis of macromolecular structures.
